# Supplementary material for: What is the trigger mechanism for the reversal of electron flow in oxygen-tolerant [NiFe] hydrogenases?
Source: PubMed Central journal article supplement (PMC5811149; doi:10.1039/c4sc03223c), 2014-12-08
Supplement: SC-006-C4SC03223C-s001.pdf [file SC-006-C4SC03223C-s001.pdf]

## What is the trigger mechanism for the reversal of electron flow in oxygen-tolerant hydrogenases?

Ian Dance

School of Chemistry, University of New South Wales, Sydney 2052, Australia. e-mail: i.dance@unsw.edu.au

### Supplementary information

#### Computational methods

All calculations reported in this paper use Delley's DMol3 package,<sup>1-3</sup> with numerical basis sets (dnp). The calculations are all-electron, spin unrestricted, with a fine integration mesh. Validation results have been reported<sup>4-7</sup> (and see below). Potential energy surfaces around the intermediates and reaction trajectories were explored. Transition states were located and checked using the method previously developed for the complex trajectories of reactions of the FeMo-co cluster in nitrogenase.<sup>8,9</sup>

The basic models used are shown in Fig S1. Model (a) includes residues 17, 18, 19, 20, 113, 114, 115, with cysteines 120 and 149 truncated as SCH<sub>2</sub>C<sup>α</sup>H<sub>3</sub> with the C<sup>α</sup> atom fixed, and with the C<sup>α</sup> atom of His229 capped as CH<sub>3</sub>. The location of His229 C<sup>α</sup> was monitored and sometimes fixed, allowing conformational variability of the His229 sidechain, without unreasonable positional excursions. Once it was demonstrated that the hydrogen bonds from N<sup>114</sup>-H and N<sup>115</sup>-H to S3 did not control the position of S3 (although they prevent *exo* protonation of S3), this section was not included and cysteine 115 was treated as SCH<sub>2</sub>C<sup>α</sup>H<sub>3</sub> with the C<sup>α</sup> atom fixed (Fig S1 (b)). Models (a) and (b) represent the RED state, with core charge [Fe<sub>4</sub>S<sub>3</sub>]<sup>3+</sup>. Model (c) and variants was used in explorations of water coordinated to Fe1.

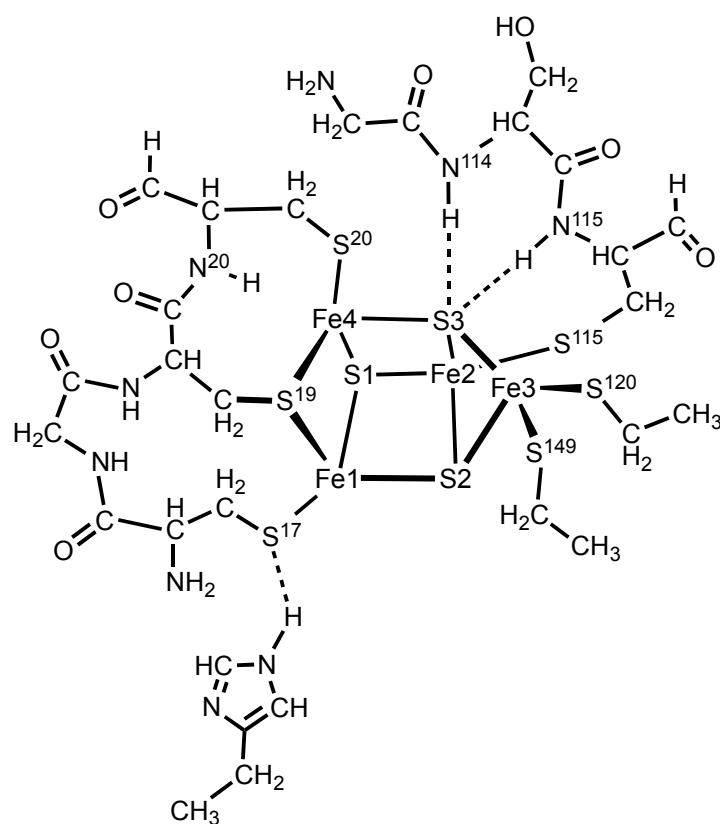

(a)

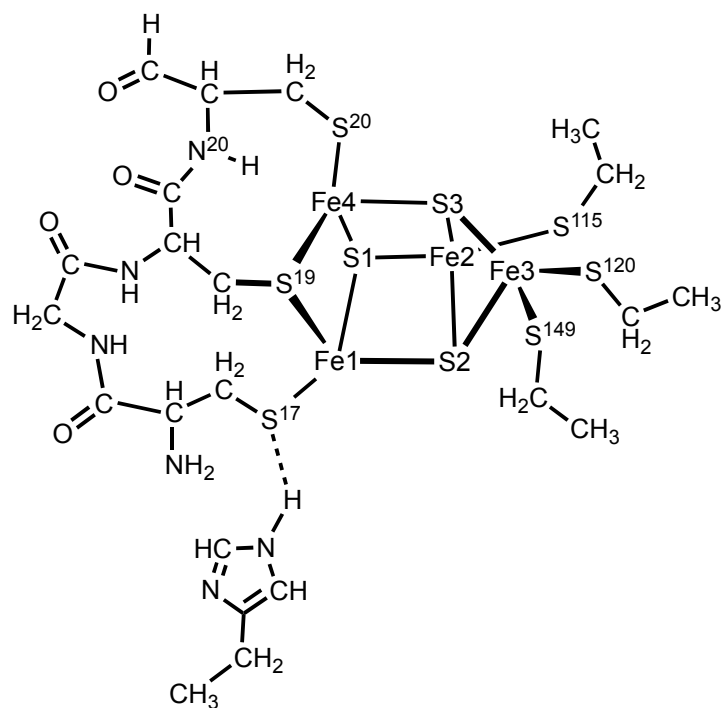

(b)

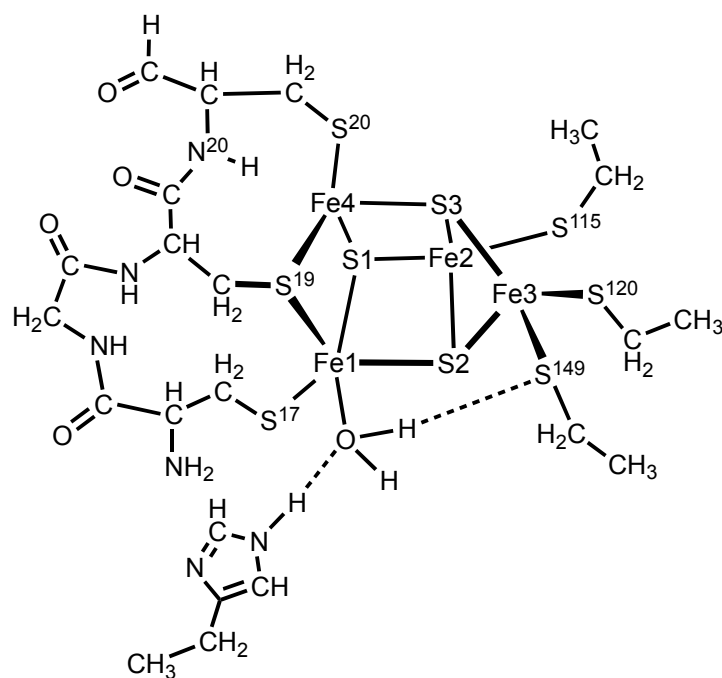

(c)

Fig. S1.

Electronic state. As in previous calculations, the electronic states of models were specified and controlled by fixing the signs of the spin densities on the four Fe atoms, and the total spin state  $S$ . Some exploration of the relative energies of electronic states was undertaken, mainly with  $[\text{Fe}_4\text{S}_2(\text{SH})(\text{SMe})_6]^{2-}$ , that is  $[\text{Fe}_4\text{S}_3(\text{SMe})_6]^{3-}$  protonated in the *endo* configuration with the same geometry as the protonated form of S3 in the proximal cluster. The energy variations were minor, with the Fe1 +, Fe2 -, Fe3 +, Fe4 -,  $S = -1/2$  state being ca 1 kcal mol<sup>-1</sup> more stable than Fe1 +, Fe2 +, Fe3 -, Fe4 -,  $S = 1/2$  state (Fe atom numbering as in Fig. S1). These are the BS13, BS34 states in the nomenclature of previous authors.<sup>10,11</sup> The structures calculated for the protonation mechanism (Fig. 6, and presented below) were all on the Fe1 +, Fe2 +, Fe3 -, Fe4 -,  $S = -1/2$  electronic surface (BS12). Magnitudes of the Fe spin densities are generally ca 3.1. According to Pandelia *et al* the RED state has  $S = 1/2$ .<sup>12</sup> Previous authors have discussed the electronic states of the proximal cluster

in some detail, in relation to spectroscopic data.<sup>10,13,12,14,11</sup> In my experience with DFT calculations on FeS clusters, the shapes of the potential energy surfaces, and thus the calculated barriers for reaction steps, are only slightly dependent on the electronic state followed.

Two density functionals were tested, through calculations of the RED structure, PDB 3RGW, using a model that contained the six cysteine residues in full. Comparison of calculated bond distances are presented in Table S1. The pbe distances are shorter than those of blyp and are closer to the experimental distances. Pelmenchikov<sup>15</sup> also found pbe to give tighter binding than b3lyp. In the models presented here Cys19 is sometimes protonated, which is expected to weaken its coordination, and it also unbridges. The pbe functional was found to give more realistic distances for such Fe-S(H)-cys coordination.

**Table S1.** Comparison of calculated and experimental bond distances in the RED form of the proximal cluster.

| bond     | experimental (PDB 3RGW)    | calculated blyp (BS24) | calculated pbe (BS24) |
|----------|----------------------------|------------------------|-----------------------|
| Fe1-S19  | 2.31                       | 2.40                   | 2.33                  |
| Fe4-S19  | 2.31                       | 2.42                   | 2.35                  |
| Fe1-S1   | 2.29                       | 2.32                   | 2.29                  |
| Fe1-S2   | 2.27                       | 2.40                   | 2.35                  |
| Fe2-S1   | 2.28                       | 2.33                   | 2.29                  |
| Fe2-S2   | 2.28                       | 2.28                   | 2.25                  |
| Fe2-S3   | 2.27                       | 2.33                   | 2.29                  |
| Fe2-S15  | 2.27                       | 2.35                   | 2.31                  |
| Fe3-S2   | 2.29                       | 2.34                   | 2.30                  |
| Fe3-S3   | 2.29                       | 2.26                   | 2.22                  |
| Fe3-S120 | 2.34                       | 2.40                   | 2.36                  |
| Fe3-S149 | 2.30                       | 2.34                   | 2.30                  |
| Fe4-S1   | 2.28                       | 2.32                   | 2.27                  |
| Fe4-S3   | 2.31                       | 2.40                   | 2.35                  |
| Fe4-S20  | 2.30                       | 2.36                   | 2.31                  |
|          | jmol_3RGW_fe4s3_md1_140801 | 3grwh.car_11           | 3grwhpbe.car_3        |

### Protonation of the $[\text{Fe}_4\text{S}_3(\text{SR})_6]$ structure type.

Protonation of an  $[\text{Fe}_4\text{S}_3(\text{SR})_6]$  cluster could occur at the thiolate ligand and/or  $\mu_3$ -S, and I have investigated aspects of both. As expected, protonation of SMe elongates its bond(s) to Fe. Assuming  $C_s$  symmetry for the core of  $[\text{Fe}_4\text{S}_3(\text{SMe})_6]^{3-}$  there are ten ways to protonate  $\mu_3$ -S and elongate a bond of the resulting  $\mu$ -SH to Fe: the  $\mu$ -SH function bridging two Fe atoms has pyramidal stereochemistry, and there are two configurations for the S-H bond, either *endo* or *exo* relative to the elongated S-Fe bond. Detailed results from these calculations, including the effects of electronic structure, will be described separately, but the outcome relevant to the present context is shown in Fig S2: protonation of the S atom homologous to S3 of the proximal cluster causes the S3-Fe4 bond to break (to 3.28Å), and the structural change is reversed on deprotonation.

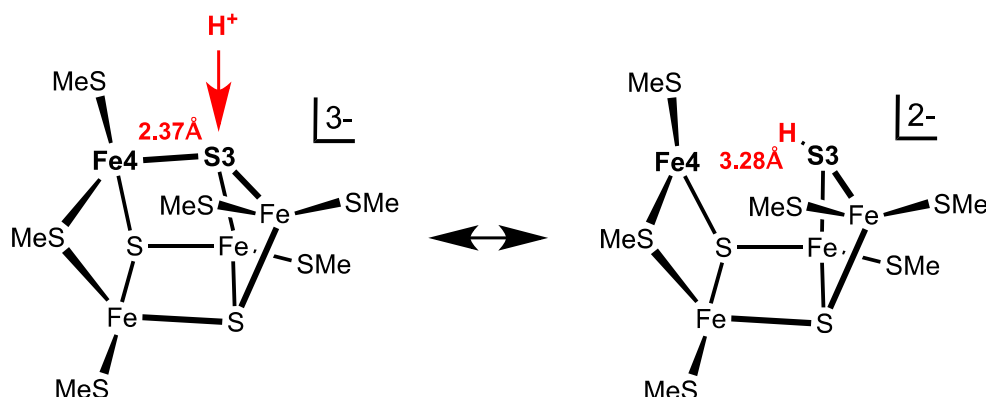

**Fig S2.** The consequences of protonation of S3 in  $[\text{Fe}_4\text{S}_3(\text{SMe})_6]^{3-}$ . The S3-H conformation is *endo*, towards Fe4.

### The NH deprotonation cycle

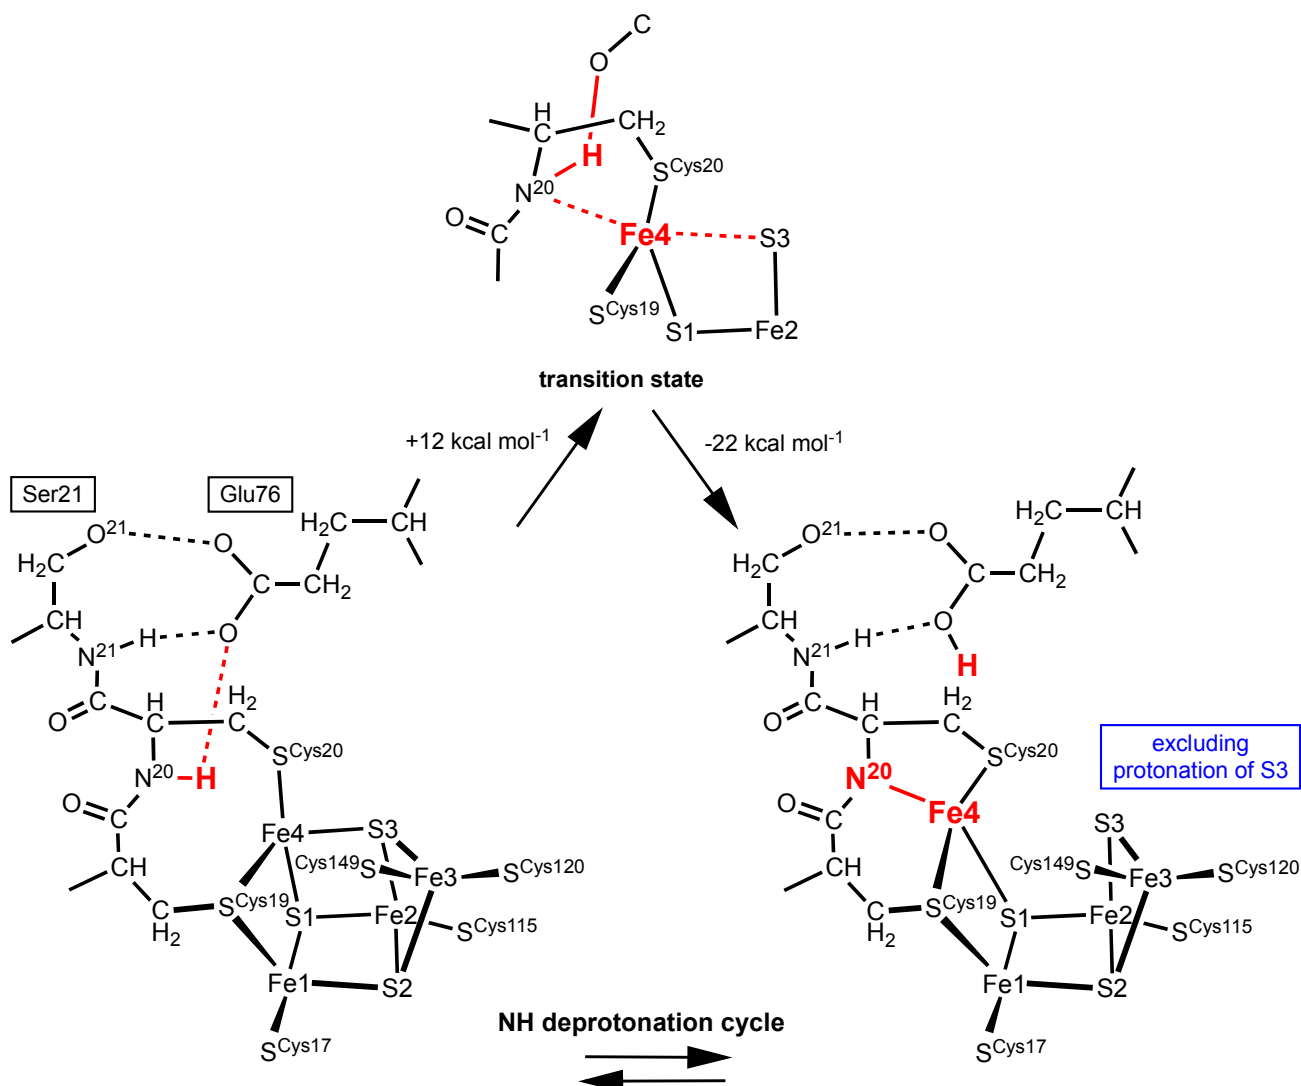

**Fig. S3.** The essence of the mechanism calculated by Pelmeshnikov and Kaupp<sup>15</sup> for the movement of the proton on N<sup>20</sup> to the side-chain of Glu76 of the super-oxidised form of the proximal cluster  $[\text{4Fe-3S}]^{5+}$ , and formation of the N<sup>20</sup>-Fe4 bond (adapted from reference <sup>15</sup>). This is the NH deprotonation cycle.

### Oxidation of the closed form of the proximal cluster.

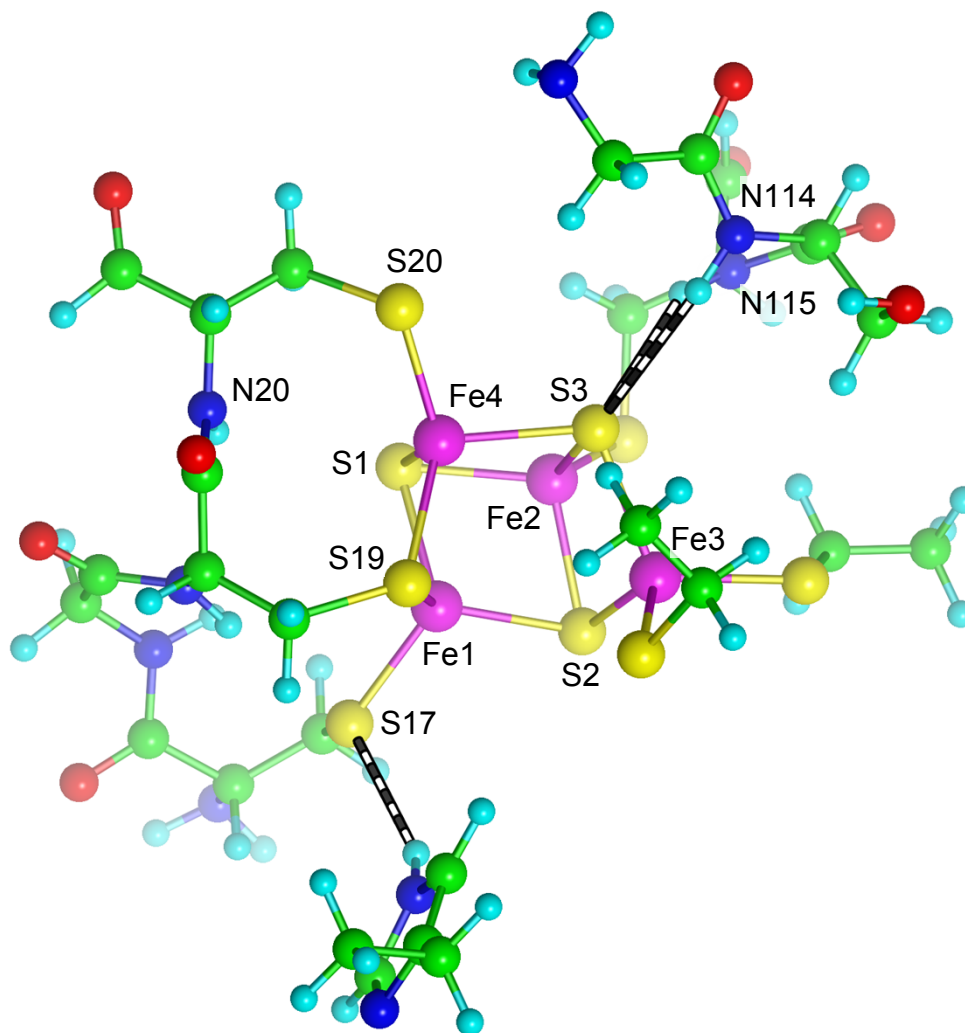

**Fig S4.** Model used for calculation of the redox states of the closed cluster. Residues 17, 18, 19, 20, 115, 114 are included in full: residues Cys120, Cys149 and His229 are capped as CH<sub>3</sub> at the C $\alpha$  atom. Broken bonds are N-H...S hydrogen bonds.

**Table S2.** Atom properties for three oxidation states of the model in Fig S3.

| atom | RED<br>core [Fe <sub>4</sub> S <sub>3</sub> ] <sup>3+</sup> |              | OX<br>core [Fe <sub>4</sub> S <sub>3</sub> ] <sup>4+</sup> |              | SOX<br>core [Fe <sub>4</sub> S <sub>3</sub> ] <sup>5+</sup> |              |
|------|-------------------------------------------------------------|--------------|------------------------------------------------------------|--------------|-------------------------------------------------------------|--------------|
|      | charge                                                      | spin density | charge                                                     | spin density | charge                                                      | spin density |
| Fe1  | 0.57                                                        | 2.87         | 0.61                                                       | 3.19         | 0.59                                                        | 3.06         |
| Fe2  | 0.60                                                        | 3.02         | 0.60                                                       | 3.09         | 0.56                                                        | 2.79         |
| Fe3  | 0.71                                                        | -3.40        | 0.70                                                       | -3.36        | 0.65                                                        | -3.10        |
| Fe4  | 0.57                                                        | -2.97        | 0.54                                                       | -2.70        | 0.61                                                        | -3.16        |
| S1   | -0.70                                                       |              | -0.62                                                      |              | -0.54                                                       |              |
| S2   | -0.60                                                       |              | -0.55                                                      |              | -0.48                                                       |              |
| S3   | -0.74                                                       |              | -0.68                                                      |              | -0.62                                                       |              |
| S17  | -0.66                                                       |              | -0.61                                                      |              | -0.53                                                       |              |
| S19  | -0.45                                                       |              | -0.40                                                      |              | -0.38                                                       |              |
| S20  | -0.53                                                       |              | -0.46                                                      |              | -0.40                                                       |              |

**Table S3.** Selected distances (Å) for three oxidation states of the model in Fig S3.

|         | RED<br>core [Fe <sub>4</sub> S <sub>3</sub> ] <sup>3+</sup> | OX<br>core [Fe <sub>4</sub> S <sub>3</sub> ] <sup>4+</sup> | SOX<br>core [Fe <sub>4</sub> S <sub>3</sub> ] <sup>5+</sup> |
|---------|-------------------------------------------------------------|------------------------------------------------------------|-------------------------------------------------------------|
| S3-Fe2  | 2.28                                                        | 2.27                                                       | 2.25                                                        |
| S3-Fe3  | 2.4386                                                      | 2.42                                                       | 2.42                                                        |
| S3-Fe4  | 2.42                                                        | 2.40                                                       | 2.36                                                        |
| S1-Fe1  | 2.36                                                        | 2.36                                                       | 2.34                                                        |
| S1-Fe2  | 2.34                                                        | 2.34                                                       | 2.30                                                        |
| S1-Fe4  | 2.28                                                        | 2.25                                                       | 2.25                                                        |
| S2-Fe1  | 2.35                                                        | 2.34                                                       | 2.32                                                        |
| S2-Fe2  | 2.35                                                        | 2.34                                                       | 2.32                                                        |
| S2-Fe3  | 2.25                                                        | 2.24                                                       | 2.21                                                        |
| S19-Fe1 | 2.38                                                        | 2.38                                                       | 2.35                                                        |
| S19-Fe4 | 2.41                                                        | 2.36                                                       | 2.43                                                        |

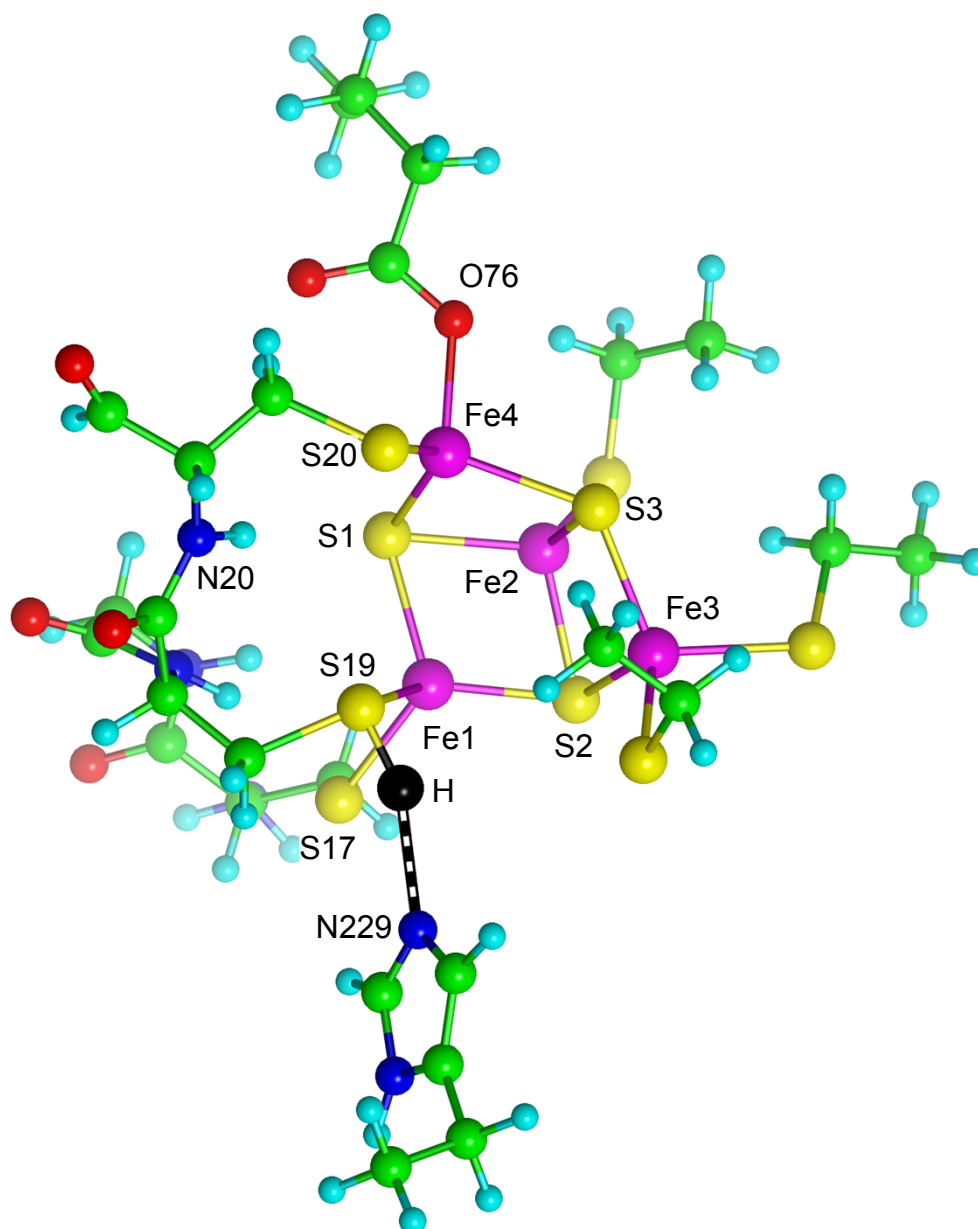

**Fig S5.** Model of S19-H<sup>exo</sup> with coordination of Glu76 side chain to Fe4.

## Water coordination of Fe1

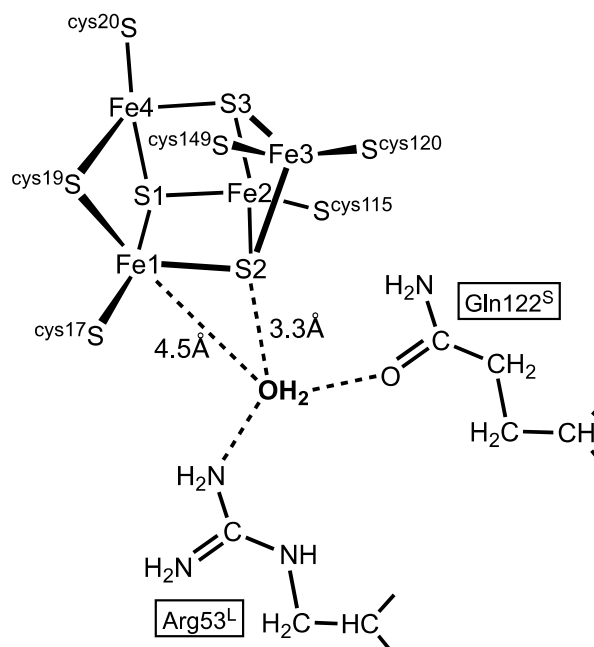

**Fig. S6.** A conserved water molecule hydrogen bonded to Gln122<sup>S</sup> and Arg53<sup>L</sup> could move to Fe1.



**Table S4.** Pictures and cartesian coordinates (Å) for the calculated structures in Fig. 6.

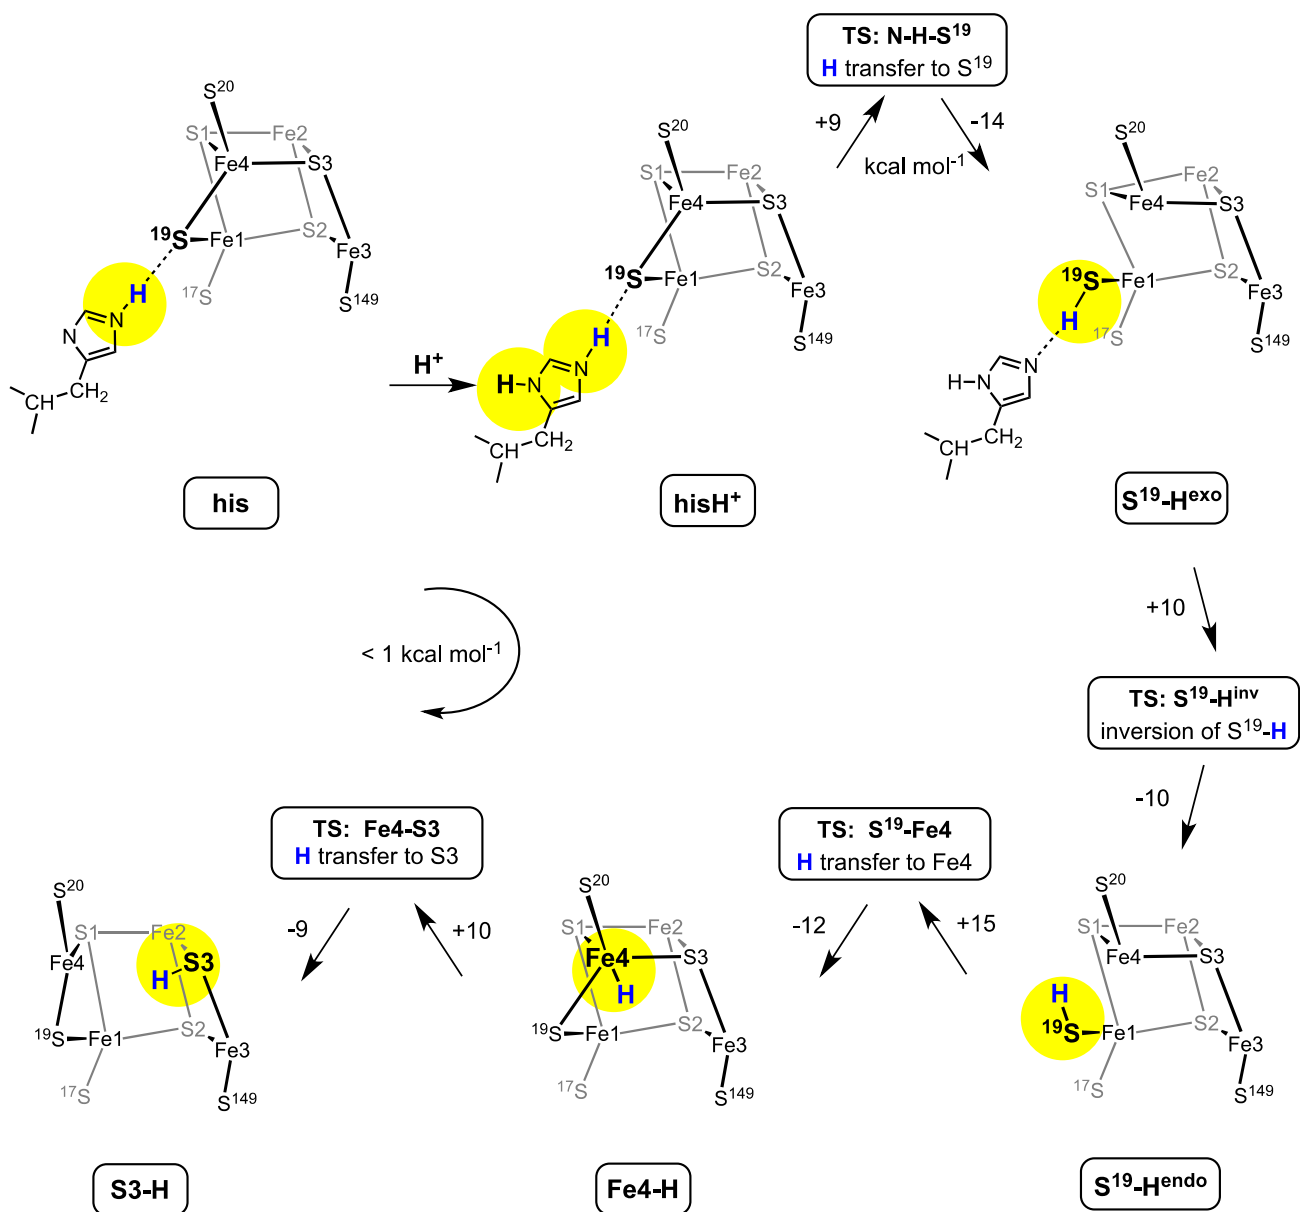



|   |    |        |        |        |
|---|----|--------|--------|--------|
| H | 66 | 10.144 | 24.376 | 3.504  |
| N | 67 | 7.340  | 13.866 | 7.026  |
| N | 68 | 7.868  | 16.027 | 6.886  |
| N | 69 | 3.052  | 21.007 | 6.140  |
| N | 70 | 3.227  | 18.685 | 4.517  |
| N | 71 | 4.795  | 16.451 | -0.774 |
| N | 72 | 3.389  | 18.478 | 1.699  |
| O | 73 | 2.112  | 19.715 | 7.777  |
| O | 74 | 0.746  | 23.458 | 7.387  |
| O | 75 | 2.300  | 16.869 | 0.474  |
| O | 76 | 0.971  | 19.091 | 4.359  |
| S | 77 | 5.964  | 17.204 | 3.133  |
| S | 78 | 6.190  | 19.111 | 6.131  |
| S | 79 | 5.463  | 23.167 | 6.463  |
| S | 80 | 8.961  | 22.457 | 1.448  |
| S | 81 | 12.223 | 20.860 | 4.773  |
| S | 82 | 10.091 | 18.832 | 6.827  |
| S | 83 | 9.059  | 19.311 | 3.249  |
| S | 84 | 8.554  | 22.121 | 5.352  |
| S | 85 | 5.804  | 21.103 | 3.157  |

Key H atoms are emphasised as large black spheres.

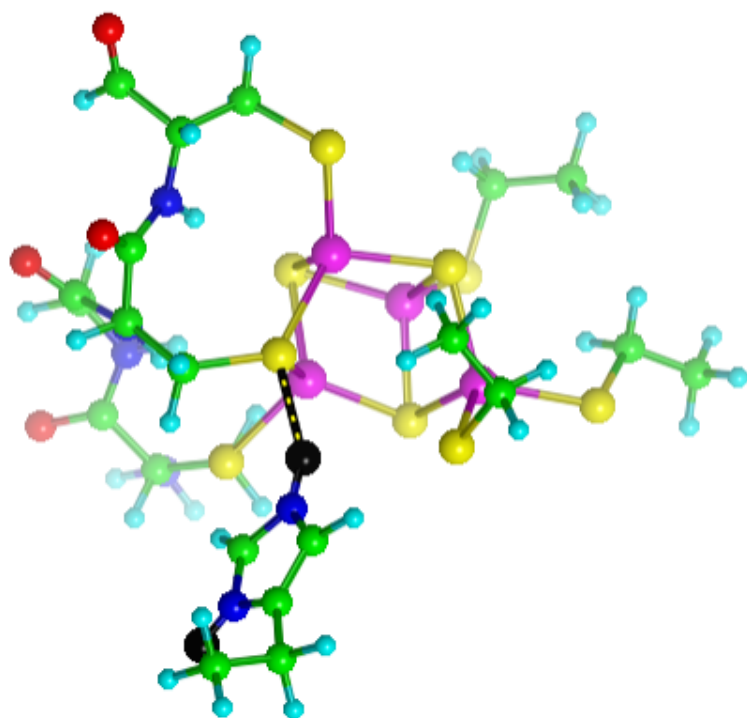

redv318nh19hpbtg\_12.cmmf

**hisH<sup>+</sup>**

|    |    |    |        |        |        |
|----|----|----|--------|--------|--------|
| 86 | C  | 1  | 12.266 | 9.551  | 8.210  |
|    | C  | 2  | 13.535 | 9.702  | 7.352  |
|    | C  | 3  | 13.463 | 10.775 | 6.313  |
|    | C  | 4  | 14.135 | 11.962 | 6.178  |
|    | C  | 5  | 12.813 | 11.797 | 4.408  |
|    | C  | 6  | 12.532 | 13.458 | -0.358 |
|    | C  | 7  | 10.561 | 16.173 | 4.073  |
|    | C  | 8  | 10.642 | 17.591 | 4.667  |
|    | C  | 9  | 11.650 | 15.267 | 4.673  |
|    | C  | 10 | 11.605 | 19.831 | 4.445  |
|    | C  | 11 | 10.423 | 20.751 | 4.200  |
|    | C  | 12 | 12.853 | 20.420 | 3.752  |
|    | C  | 13 | 19.133 | 18.923 | -0.147 |
|    | C  | 14 | 17.648 | 18.803 | -0.481 |
|    | C  | 15 | 21.549 | 15.177 | 0.504  |
|    | C  | 16 | 20.249 | 15.664 | 1.161  |
|    | C  | 17 | 16.886 | 15.872 | 6.759  |
|    | C  | 18 | 17.789 | 14.799 | 6.160  |
|    | C  | 19 | 11.156 | 13.316 | -0.997 |
|    | C  | 20 | 10.112 | 14.393 | -0.655 |
|    | C  | 21 | 9.661  | 16.582 | 0.365  |
|    | C  | 22 | 9.551  | 16.683 | 1.894  |
|    | H  | 23 | 12.005 | 9.938  | 4.950  |
|    | H  | 24 | 13.969 | 13.562 | 4.700  |
|    | Fe | 25 | 15.943 | 16.550 | 1.148  |
|    | Fe | 26 | 17.378 | 14.963 | 2.900  |
|    | Fe | 27 | 14.032 | 15.054 | 2.045  |
|    | Fe | 28 | 14.507 | 17.485 | 3.195  |
|    | H  | 29 | 19.742 | 18.413 | -0.911 |
|    | H  | 30 | 19.446 | 19.983 | -0.100 |
|    | H  | 31 | 14.390 | 9.935  | 8.004  |
|    | H  | 32 | 8.658  | 16.372 | -0.021 |
|    | H  | 33 | 14.921 | 12.405 | 6.775  |
|    | H  | 34 | 12.399 | 8.754  | 8.956  |
|    | H  | 35 | 12.029 | 10.479 | 8.751  |
|    | H  | 36 | 11.381 | 9.288  | 7.610  |
|    | H  | 37 | 12.362 | 11.998 | 3.428  |
|    | H  | 38 | 13.773 | 8.735  | 6.869  |
|    | H  | 39 | 13.170 | 12.617 | -0.670 |
|    | H  | 40 | 11.220 | 15.472 | 2.163  |
|    | H  | 41 | 13.041 | 14.373 | -0.690 |
|    | H  | 42 | 12.958 | 21.461 | 4.091  |
|    | H  | 43 | 12.710 | 20.428 | 2.659  |
|    | H  | 44 | 11.781 | 19.784 | 5.530  |

|  |   |    |        |        |        |
|--|---|----|--------|--------|--------|
|  | H | 45 | 9.746  | 20.423 | 3.371  |
|  | H | 46 | 9.591  | 15.803 | 4.455  |
|  | H | 47 | 11.567 | 15.354 | 5.766  |
|  | H | 48 | 11.404 | 14.229 | 4.396  |
|  | H | 49 | 21.411 | 14.176 | 0.064  |
|  | H | 50 | 10.700 | 12.386 | -0.599 |
|  | H | 51 | 9.967  | 17.579 | 0.011  |
|  | H | 52 | 21.853 | 15.874 | -0.297 |
|  | H | 53 | 15.984 | 15.428 | 7.210  |
|  | H | 54 | 11.558 | 15.701 | 0.015  |
|  | H | 55 | 16.554 | 16.577 | 5.984  |
|  | H | 56 | 10.346 | 13.146 | -2.866 |
|  | H | 57 | 17.422 | 16.441 | 7.543  |
|  | H | 58 | 11.868 | 12.529 | -2.758 |
|  | H | 59 | 18.139 | 14.099 | 6.939  |
|  | H | 60 | 18.681 | 15.250 | 5.700  |
|  | H | 61 | 22.367 | 15.112 | 1.240  |
|  | H | 62 | 20.406 | 16.661 | 1.599  |
|  | H | 63 | 19.448 | 15.765 | 0.414  |
|  | H | 64 | 17.040 | 19.256 | 0.315  |
|  | H | 65 | 17.414 | 19.330 | -1.420 |
|  | H | 66 | 11.860 | 18.171 | 3.126  |
|  | H | 67 | 19.348 | 18.455 | 0.822  |
|  | N | 68 | 12.641 | 10.695 | 5.184  |
|  | N | 69 | 13.728 | 12.559 | 5.010  |
|  | N | 70 | 11.335 | 18.499 | 3.941  |
|  | N | 71 | 10.555 | 16.117 | 2.617  |
|  | N | 72 | 11.276 | 13.313 | -2.473 |
|  | N | 73 | 10.560 | 15.576 | -0.157 |
|  | O | 74 | 10.119 | 17.836 | 5.762  |
|  | O | 75 | 10.224 | 21.792 | 4.811  |
|  | O | 76 | 8.912  | 14.155 | -0.871 |
|  | O | 77 | 8.623  | 17.330 | 2.399  |
|  | S | 78 | 12.469 | 13.468 | 1.494  |
|  | S | 79 | 13.476 | 15.516 | 4.271  |
|  | S | 80 | 14.426 | 19.531 | 4.150  |
|  | S | 81 | 17.107 | 17.045 | -0.739 |
|  | S | 82 | 19.646 | 14.549 | 2.520  |
|  | S | 83 | 16.952 | 13.777 | 4.858  |
|  | S | 84 | 16.040 | 14.281 | 1.257  |
|  | S | 85 | 16.814 | 17.228 | 3.072  |
|  | S | 86 | 13.726 | 17.163 | 1.109  |
|  |   | 86 |        |        |        |
|  | C | 1  | 12.814 | 8.675  | 8.068  |
|  | C | 2  | 13.903 | 8.992  | 7.022  |
|  | C | 3  | 13.602 | 10.134 | 6.096  |
|  | C | 4  | 14.209 | 11.352 | 5.875  |
|  | C | 5  | 12.545 | 11.239 | 4.437  |
|  | C | 6  | 12.519 | 13.529 | -0.782 |
|  | C | 7  | 10.671 | 16.030 | 3.840  |
|  | C | 8  | 10.839 | 17.423 | 4.492  |
|  | C | 9  | 11.618 | 14.973 | 4.438  |
|  | C | 10 | 11.785 | 19.672 | 4.363  |
|  | C | 11 | 10.581 | 20.603 | 4.263  |
|  | C | 12 | 12.986 | 20.334 | 3.662  |
|  | C | 13 | 19.145 | 18.891 | -0.876 |
|  | C | 14 | 17.646 | 18.861 | -1.192 |
|  | C | 15 | 21.587 | 15.122 | -0.537 |
|  | C | 16 | 20.291 | 15.571 | 0.157  |
|  | C | 17 | 17.397 | 15.598 | 6.065  |
|  | C | 18 | 18.222 | 14.524 | 5.364  |
|  | C | 19 | 11.133 | 13.408 | -1.411 |
|  | C | 20 | 10.059 | 14.389 | -0.908 |
|  | C | 21 | 9.589  | 16.528 | 0.195  |
|  | C | 22 | 9.599  | 16.606 | 1.729  |

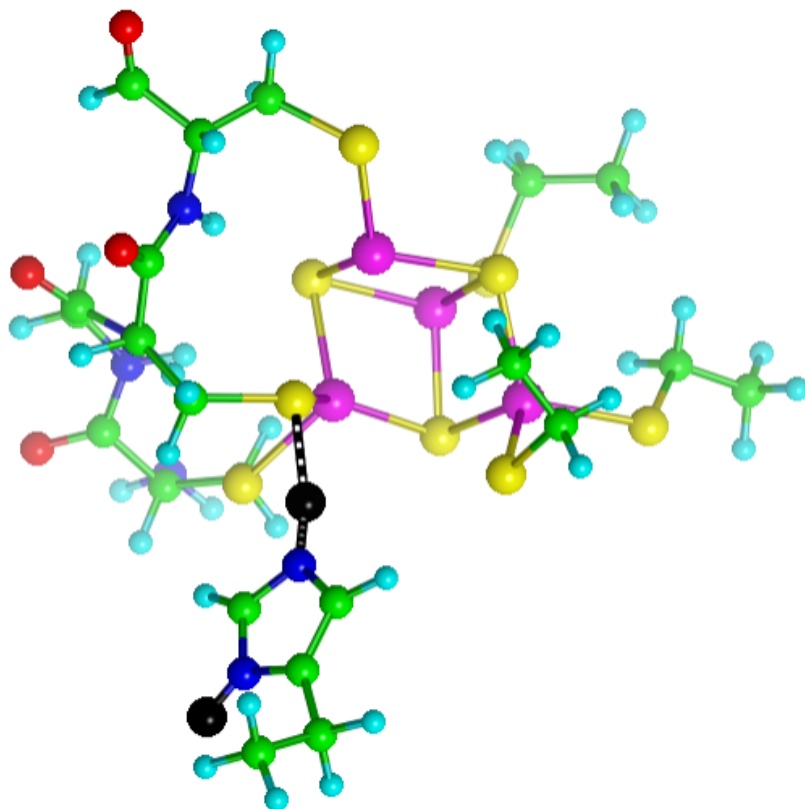

redv318nh19hppts\_1\_8778.16.cmmf

**TS: N-S19**

|    |    |        |        |        |
|----|----|--------|--------|--------|
| H  | 23 | 11.903 | 9.311  | 5.051  |
| H  | 24 | 13.656 | 13.131 | 4.525  |
| Fe | 25 | 15.996 | 16.574 | 0.619  |
| Fe | 26 | 17.571 | 14.908 | 2.177  |
| Fe | 27 | 14.135 | 14.946 | 1.711  |
| Fe | 28 | 14.862 | 17.553 | 2.809  |
| H  | 29 | 19.718 | 18.327 | -1.630 |
| H  | 30 | 19.519 | 19.931 | -0.851 |
| H  | 31 | 14.848 | 9.221  | 7.536  |
| H  | 32 | 8.570  | 16.252 | -0.102 |
| H  | 33 | 15.093 | 11.782 | 6.334  |
| H  | 34 | 13.120 | 7.818  | 8.686  |
| H  | 35 | 12.640 | 9.532  | 8.733  |
| H  | 36 | 11.855 | 8.412  | 7.599  |
| H  | 37 | 11.878 | 11.463 | 3.607  |
| H  | 38 | 14.101 | 8.079  | 6.427  |
| H  | 39 | 13.147 | 12.710 | -1.165 |
| H  | 40 | 11.297 | 15.399 | 1.886  |
| H  | 41 | 13.006 | 14.465 | -1.090 |
| H  | 42 | 13.084 | 21.347 | 4.077  |
| H  | 43 | 12.789 | 20.428 | 2.583  |
| H  | 44 | 12.014 | 19.554 | 5.433  |
| H  | 45 | 9.829  | 20.324 | 3.482  |
| H  | 46 | 9.660  | 15.753 | 4.186  |
| H  | 47 | 11.548 | 15.101 | 5.525  |
| H  | 48 | 11.204 | 13.990 | 4.180  |
| H  | 49 | 21.496 | 14.088 | -0.904 |
| H  | 50 | 10.720 | 12.414 | -1.146 |
| H  | 51 | 9.790  | 17.547 | -0.173 |
| H  | 52 | 21.813 | 15.780 | -1.395 |
| H  | 53 | 16.496 | 15.166 | 6.531  |
| H  | 54 | 11.496 | 15.742 | -0.323 |
| H  | 55 | 17.059 | 16.354 | 5.342  |
| H  | 56 | 10.357 | 13.325 | -3.312 |
| H  | 57 | 17.989 | 16.107 | 6.848  |
| H  | 58 | 11.974 | 13.012 | -3.244 |
| H  | 59 | 18.572 | 13.767 | 6.086  |
| H  | 60 | 19.110 | 14.960 | 4.886  |
| H  | 61 | 22.439 | 15.153 | 0.162  |
| H  | 62 | 20.417 | 16.595 | 0.535  |
| H  | 63 | 19.456 | 15.597 | -0.557 |
| H  | 64 | 17.080 | 19.388 | -0.411 |
| H  | 65 | 17.449 | 19.377 | -2.146 |
| H  | 66 | 12.004 | 18.091 | 2.937  |
| H  | 67 | 19.328 | 18.434 | 0.106  |
| N  | 68 | 12.552 | 10.086 | 5.173  |
| N  | 69 | 13.549 | 12.013 | 4.860  |
| N  | 70 | 11.500 | 18.373 | 3.781  |
| N  | 71 | 10.649 | 16.034 | 2.382  |
| N  | 72 | 11.235 | 13.616 | -2.876 |
| N  | 73 | 10.493 | 15.585 | -0.422 |
| O  | 74 | 10.367 | 17.626 | 5.618  |
| O  | 75 | 10.443 | 21.611 | 4.942  |
| O  | 76 | 8.858  | 14.089 | -1.013 |
| O  | 77 | 8.691  | 17.224 | 2.304  |
| S  | 78 | 12.517 | 13.439 | 1.070  |
| S  | 79 | 13.461 | 14.958 | 4.058  |
| S  | 80 | 14.615 | 19.498 | 3.936  |
| S  | 81 | 16.945 | 17.147 | -1.392 |
| S  | 82 | 19.802 | 14.497 | 1.590  |
| S  | 83 | 17.249 | 13.626 | 4.068  |
| S  | 84 | 16.071 | 14.304 | 0.654  |
| S  | 85 | 17.097 | 17.202 | 2.451  |
| S  | 86 | 13.772 | 17.108 | 0.912  |

86

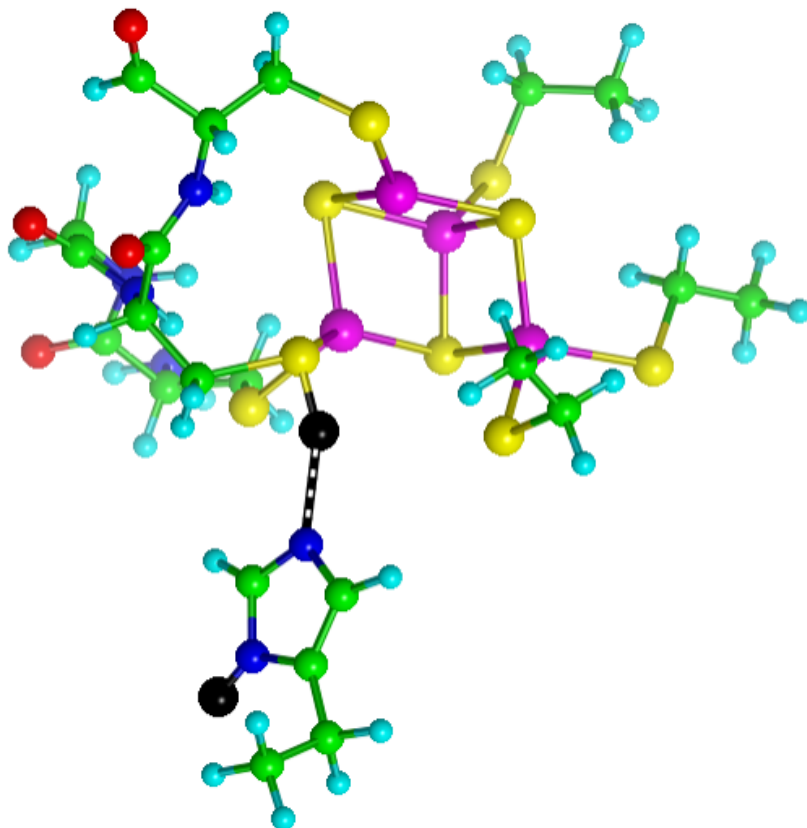

redv318nh19hpbtm\_7.cmmf

**S19-Hexo**

|    |    |        |        |        |
|----|----|--------|--------|--------|
| C  | 1  | 12.877 | 6.776  | 9.695  |
| C  | 2  | 13.960 | 7.255  | 8.712  |
| C  | 3  | 13.651 | 8.551  | 8.034  |
| C  | 4  | 14.208 | 9.809  | 8.146  |
| C  | 5  | 12.628 | 10.020 | 6.695  |
| C  | 6  | 12.494 | 13.582 | 2.205  |
| C  | 7  | 10.642 | 14.777 | 7.269  |
| C  | 8  | 10.872 | 15.959 | 8.240  |
| C  | 9  | 11.647 | 13.641 | 7.506  |
| C  | 10 | 11.873 | 18.156 | 8.606  |
| C  | 11 | 10.617 | 19.017 | 8.702  |
| C  | 12 | 13.037 | 18.998 | 8.058  |
| C  | 13 | 19.032 | 18.745 | 3.252  |
| C  | 14 | 17.553 | 18.790 | 2.877  |
| C  | 15 | 21.499 | 15.020 | 2.677  |
| C  | 16 | 20.225 | 15.277 | 3.489  |
| C  | 17 | 17.409 | 13.922 | 9.266  |
| C  | 18 | 18.176 | 13.078 | 8.255  |
| C  | 19 | 11.087 | 13.496 | 1.621  |
| C  | 20 | 10.005 | 14.359 | 2.288  |
| C  | 21 | 9.516  | 16.167 | 3.876  |
| C  | 22 | 9.548  | 15.903 | 5.388  |
| H  | 23 | 13.804 | 12.707 | 7.298  |
| H  | 24 | 12.024 | 7.974  | 6.753  |
| Fe | 25 | 16.062 | 16.256 | 4.116  |
| Fe | 26 | 17.561 | 14.243 | 5.271  |
| Fe | 27 | 14.199 | 14.501 | 4.916  |
| Fe | 28 | 15.199 | 16.950 | 6.471  |
| H  | 29 | 19.649 | 18.410 | 2.404  |
| H  | 30 | 19.383 | 19.748 | 3.565  |
| H  | 31 | 14.911 | 7.389  | 9.252  |
| H  | 32 | 8.501  | 15.951 | 3.523  |
| H  | 33 | 15.058 | 10.117 | 8.749  |
| H  | 34 | 13.172 | 5.832  | 10.178 |
| H  | 35 | 12.704 | 7.526  | 10.480 |
| H  | 36 | 11.918 | 6.599  | 9.184  |
| H  | 37 | 11.958 | 10.413 | 5.933  |
| H  | 38 | 14.150 | 6.465  | 7.962  |
| H  | 39 | 13.142 | 12.870 | 1.670  |
| H  | 40 | 11.186 | 14.621 | 5.198  |
| H  | 41 | 12.923 | 14.581 | 2.037  |
| H  | 42 | 13.059 | 19.932 | 8.633  |
| H  | 43 | 12.864 | 19.245 | 6.998  |
| H  | 44 | 12.129 | 17.829 | 9.626  |
| H  | 45 | 9.841  | 18.797 | 7.928  |
| H  | 46 | 9.651  | 14.399 | 7.582  |
| H  | 47 | 11.552 | 13.329 | 8.553  |
| H  | 48 | 11.389 | 12.801 | 6.851  |
| H  | 49 | 21.383 | 14.127 | 2.039  |
| H  | 50 | 10.720 | 12.460 | 1.770  |
| H  | 51 | 9.699  | 17.243 | 3.742  |
| H  | 52 | 21.729 | 15.884 | 2.027  |
| H  | 53 | 16.519 | 13.383 | 9.630  |
| H  | 54 | 11.429 | 15.487 | 3.244  |
| H  | 55 | 17.062 | 14.856 | 8.803  |
| H  | 56 | 10.180 | 13.745 | -0.201 |
| H  | 57 | 18.043 | 14.176 | 10.135 |
| H  | 58 | 11.761 | 13.293 | -0.314 |
| H  | 59 | 18.524 | 12.136 | 8.713  |
| H  | 60 | 19.064 | 13.609 | 7.882  |
| H  | 61 | 22.361 | 14.844 | 3.341  |
| H  | 62 | 20.363 | 16.164 | 4.124  |
| H  | 63 | 19.376 | 15.490 | 2.824  |
| H  | 64 | 16.948 | 19.076 | 3.749  |
| H  | 65 | 17.372 | 19.542 | 2.090  |
| H  | 66 | 12.051 | 16.935 | 6.848  |

|   |    |        |        |       |
|---|----|--------|--------|-------|
| H | 67 | 19.182 | 18.050 | 4.088 |
| N | 68 | 12.634 | 8.707  | 7.098 |
| N | 69 | 13.564 | 10.704 | 7.322 |
| N | 70 | 11.616 | 16.994 | 7.773 |
| N | 71 | 10.581 | 15.148 | 5.858 |
| N | 72 | 11.112 | 13.901 | 0.193 |
| N | 73 | 10.429 | 15.395 | 3.064 |
| O | 74 | 10.401 | 15.915 | 9.385 |
| O | 75 | 10.459 | 19.905 | 9.527 |
| O | 76 | 8.807  | 14.116 | 2.071 |
| O | 77 | 8.684  | 16.412 | 6.115 |
| S | 78 | 12.561 | 13.145 | 4.004 |
| S | 79 | 13.459 | 14.041 | 7.251 |
| S | 80 | 14.699 | 18.213 | 8.283 |
| S | 81 | 16.900 | 17.177 | 2.215 |
| S | 82 | 19.757 | 13.862 | 4.592 |
| S | 83 | 17.123 | 12.611 | 6.806 |
| S | 84 | 16.065 | 14.053 | 3.661 |
| S | 85 | 17.332 | 16.499 | 5.947 |
| S | 86 | 13.904 | 16.808 | 4.681 |

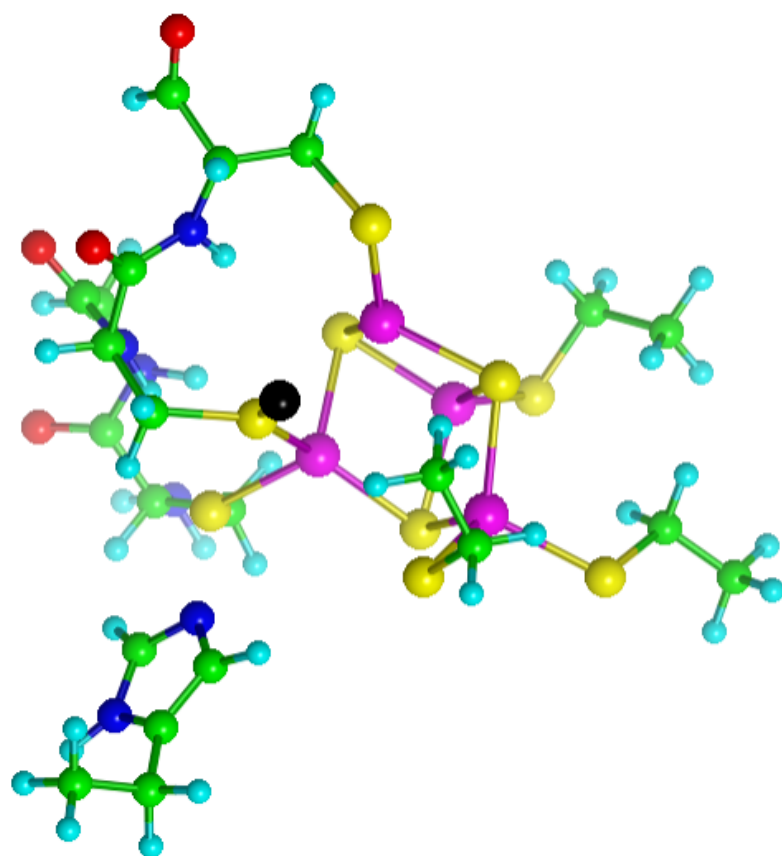

dir319httpbth\_orig.cmmf

**TS: S19-Hinv**

|    |    |        |        |        |
|----|----|--------|--------|--------|
| 86 |    |        |        |        |
| C  | 1  | 13.067 | 4.917  | 9.732  |
| C  | 2  | 14.367 | 4.781  | 8.921  |
| C  | 3  | 14.571 | 5.893  | 7.948  |
| C  | 4  | 15.444 | 6.963  | 7.930  |
| C  | 5  | 14.186 | 7.239  | 6.209  |
| C  | 6  | 15.743 | 9.700  | 2.184  |
| C  | 7  | 13.656 | 12.568 | 6.491  |
| C  | 8  | 14.010 | 13.901 | 7.182  |
| C  | 9  | 14.391 | 11.401 | 7.174  |
| C  | 10 | 15.609 | 15.748 | 7.347  |
| C  | 11 | 14.780 | 16.980 | 7.002  |
| C  | 12 | 17.087 | 15.972 | 6.966  |
| C  | 13 | 23.371 | 12.809 | 3.732  |
| C  | 14 | 22.085 | 13.168 | 2.993  |
| C  | 15 | 24.549 | 8.520  | 4.437  |
| C  | 16 | 23.353 | 9.363  | 4.893  |
| C  | 17 | 19.382 | 10.300 | 10.048 |
| C  | 18 | 20.026 | 9.061  | 9.434  |
| C  | 19 | 14.461 | 9.839  | 1.366  |
| C  | 20 | 13.605 | 11.086 | 1.634  |
| C  | 21 | 13.480 | 13.286 | 2.724  |
| C  | 22 | 13.200 | 13.400 | 4.230  |
| H  | 23 | 16.649 | 11.584 | 8.129  |
| Fe | 24 | 19.676 | 11.525 | 4.295  |
| Fe | 25 | 20.240 | 9.590  | 6.207  |
| Fe | 26 | 17.294 | 10.634 | 4.900  |
| Fe | 27 | 18.425 | 12.985 | 6.122  |
| H  | 28 | 23.973 | 12.094 | 3.151  |
| H  | 29 | 23.979 | 13.714 | 3.916  |
| H  | 30 | 15.229 | 4.772  | 9.605  |
| H  | 31 | 12.511 | 13.280 | 2.210  |
| H  | 32 | 16.272 | 7.174  | 8.604  |
| H  | 33 | 12.959 | 4.095  | 10.461 |
| H  | 34 | 13.056 | 5.871  | 10.280 |
| H  | 35 | 12.180 | 4.903  | 9.079  |
| H  | 36 | 13.767 | 7.611  | 5.276  |
| H  | 37 | 14.378 | 3.802  | 8.406  |
| H  | 38 | 16.220 | 8.741  | 1.924  |
| H  | 39 | 14.375 | 11.731 | 4.642  |
| H  | 40 | 16.466 | 10.488 | 1.920  |
| H  | 41 | 17.393 | 16.933 | 7.400  |
| H  | 42 | 17.191 | 16.044 | 5.872  |
| H  | 43 | 15.545 | 15.612 | 8.439  |
| H  | 44 | 14.102 | 16.855 | 6.121  |

|  |   |    |        |        |        |
|--|---|----|--------|--------|--------|
|  | H | 45 | 12.577 | 12.448 | 6.702  |
|  | H | 46 | 14.240 | 11.468 | 8.258  |
|  | H | 47 | 13.994 | 10.440 | 6.825  |
|  | H | 48 | 24.212 | 7.568  | 3.999  |
|  | H | 49 | 13.791 | 8.996  | 1.632  |
|  | H | 50 | 14.013 | 14.206 | 2.439  |
|  | H | 51 | 25.136 | 9.066  | 3.676  |
|  | H | 52 | 18.321 | 10.112 | 10.279 |
|  | H | 53 | 15.161 | 11.985 | 2.629  |
|  | H | 54 | 19.431 | 11.144 | 9.343  |
|  | H | 55 | 13.916 | 9.837  | -0.610 |
|  | H | 56 | 19.893 | 10.603 | 10.980 |
|  | H | 57 | 15.317 | 9.020  | -0.315 |
|  | H | 58 | 19.988 | 8.215  | 10.142 |
|  | H | 59 | 21.083 | 9.246  | 9.191  |
|  | H | 60 | 25.212 | 8.283  | 5.285  |
|  | H | 61 | 23.713 | 10.305 | 5.329  |
|  | H | 62 | 22.720 | 9.631  | 4.036  |
|  | H | 63 | 21.467 | 13.836 | 3.610  |
|  | H | 64 | 22.308 | 13.700 | 2.054  |
|  | H | 65 | 15.655 | 14.114 | 5.974  |
|  | H | 66 | 23.132 | 12.353 | 4.702  |
|  | H | 67 | 13.013 | 5.478  | 6.526  |
|  | N | 68 | 13.764 | 6.087  | 6.832  |
|  | N | 69 | 15.197 | 7.783  | 6.853  |
|  | N | 70 | 15.075 | 14.574 | 6.679  |
|  | N | 71 | 13.878 | 12.546 | 5.049  |
|  | N | 72 | 14.791 | 9.866  | -0.080 |
|  | N | 73 | 14.212 | 12.122 | 2.278  |
|  | O | 74 | 13.377 | 14.269 | 8.180  |
|  | O | 75 | 14.846 | 18.036 | 7.613  |
|  | O | 76 | 12.432 | 11.124 | 1.230  |
|  | O | 77 | 12.434 | 14.280 | 4.643  |
|  | S | 78 | 15.422 | 9.671  | 4.009  |
|  | S | 79 | 16.233 | 11.270 | 6.881  |
|  | S | 80 | 18.219 | 14.672 | 7.638  |
|  | S | 81 | 21.078 | 11.684 | 2.521  |
|  | S | 82 | 22.300 | 8.521  | 6.165  |
|  | S | 83 | 19.146 | 8.511  | 7.902  |
|  | S | 84 | 19.099 | 9.336  | 4.328  |
|  | S | 85 | 20.464 | 11.944 | 6.338  |
|  | S | 86 | 17.745 | 12.759 | 4.027  |
|  |   | 86 |        |        |        |
|  | C | 1  | 7.559  | 11.661 | 9.826  |
|  | C | 2  | 8.773  | 12.243 | 9.081  |
|  | C | 3  | 8.391  | 13.238 | 8.036  |
|  | C | 4  | 8.454  | 14.616 | 7.993  |
|  | C | 5  | 7.458  | 14.042 | 6.175  |
|  | C | 6  | 7.785  | 16.921 | 1.975  |
|  | C | 7  | 4.241  | 18.189 | 6.026  |
|  | C | 8  | 3.845  | 19.524 | 6.691  |
|  | C | 9  | 5.374  | 17.513 | 6.806  |
|  | C | 10 | 4.136  | 21.957 | 6.715  |
|  | C | 11 | 2.803  | 22.479 | 6.183  |
|  | C | 12 | 5.272  | 22.950 | 6.418  |
|  | C | 13 | 12.362 | 23.624 | 3.641  |
|  | C | 14 | 11.183 | 23.208 | 2.766  |
|  | C | 15 | 15.619 | 20.706 | 4.719  |
|  | C | 16 | 14.131 | 20.765 | 5.071  |
|  | C | 17 | 9.911  | 19.623 | 9.970  |
|  | C | 18 | 11.137 | 18.919 | 9.400  |
|  | C | 19 | 6.691  | 16.249 | 1.151  |
|  | C | 20 | 5.282  | 16.849 | 1.257  |
|  | C | 21 | 3.896  | 18.629 | 2.233  |
|  | C | 22 | 3.536  | 18.610 | 3.726  |



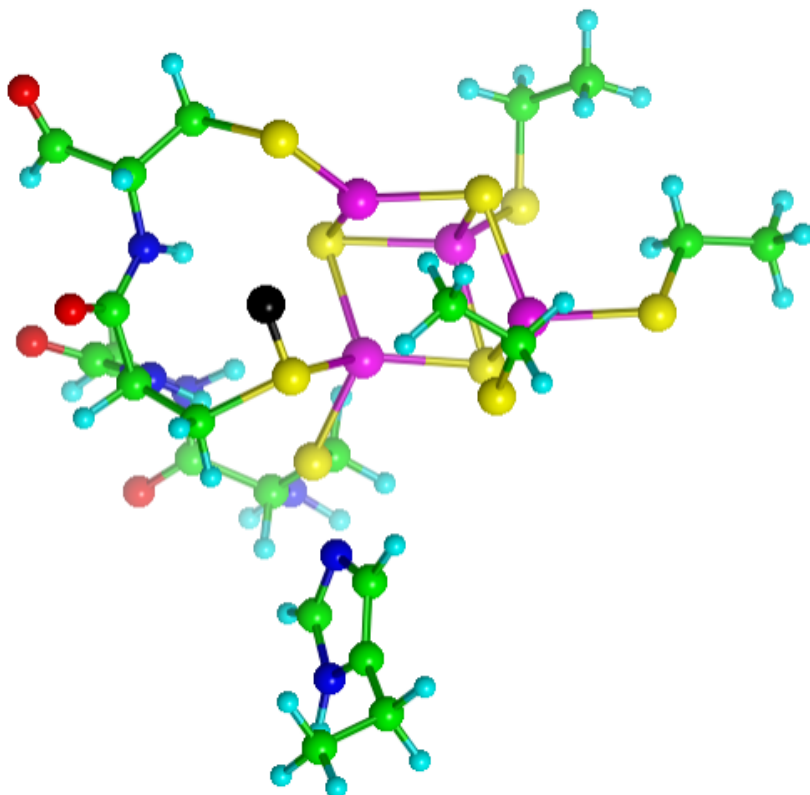

dir319httpbtb\_3.cmmf

### S19-Hendo

|    |    |        |        |        |
|----|----|--------|--------|--------|
| H  | 23 | 6.584  | 19.600 | 7.149  |
| Fe | 24 | 9.976  | 20.685 | 4.188  |
| Fe | 25 | 11.321 | 19.364 | 6.193  |
| Fe | 26 | 8.329  | 18.665 | 4.793  |
| Fe | 27 | 8.261  | 21.501 | 5.969  |
| H  | 28 | 13.317 | 23.333 | 3.176  |
| H  | 29 | 12.367 | 24.720 | 3.795  |
| H  | 30 | 9.437  | 12.750 | 9.798  |
| H  | 31 | 3.123  | 18.065 | 1.696  |
| H  | 32 | 8.920  | 15.296 | 8.704  |
| H  | 33 | 7.868  | 10.946 | 10.607 |
| H  | 34 | 6.980  | 12.467 | 10.300 |
| H  | 35 | 6.883  | 11.133 | 9.136  |
| H  | 36 | 6.980  | 14.067 | 5.198  |
| H  | 37 | 9.369  | 11.420 | 8.644  |
| H  | 38 | 8.738  | 16.398 | 1.792  |
| H  | 39 | 5.424  | 17.874 | 4.265  |
| H  | 40 | 7.941  | 17.965 | 1.664  |
| H  | 41 | 4.916  | 23.944 | 6.721  |
| H  | 42 | 5.487  | 22.978 | 5.340  |
| H  | 43 | 4.023  | 21.869 | 7.808  |
| H  | 44 | 2.372  | 21.895 | 5.330  |
| H  | 45 | 3.340  | 17.570 | 6.171  |
| H  | 46 | 5.029  | 17.403 | 7.843  |
| H  | 47 | 5.595  | 16.517 | 6.401  |
| H  | 48 | 15.882 | 19.720 | 4.304  |
| H  | 49 | 6.566  | 15.220 | 1.551  |
| H  | 50 | 3.833  | 19.682 | 1.915  |
| H  | 51 | 15.875 | 21.477 | 3.970  |
| H  | 52 | 9.103  | 18.902 | 10.168 |
| H  | 53 | 6.013  | 18.443 | 2.306  |
| H  | 54 | 9.522  | 20.363 | 9.256  |
| H  | 55 | 6.301  | 15.765 | -0.792 |
| H  | 56 | 10.152 | 20.145 | 10.915 |
| H  | 57 | 7.906  | 15.737 | -0.420 |
| H  | 58 | 11.541 | 18.196 | 10.129 |
| H  | 59 | 11.938 | 19.634 | 9.161  |
| H  | 60 | 16.244 | 20.867 | 5.613  |
| H  | 61 | 13.882 | 21.748 | 5.496  |
| H  | 62 | 13.516 | 20.641 | 4.168  |
| H  | 63 | 10.233 | 23.471 | 3.255  |
| H  | 64 | 11.208 | 23.735 | 1.797  |
| H  | 65 | 5.084  | 20.550 | 5.406  |
| H  | 66 | 12.292 | 23.141 | 4.624  |
| H  | 67 | 7.545  | 11.938 | 6.548  |
| N  | 68 | 7.741  | 12.884 | 6.859  |
| N  | 69 | 7.870  | 15.099 | 6.843  |
| N  | 70 | 4.417  | 20.642 | 6.174  |
| N  | 71 | 4.529  | 18.285 | 4.601  |
| N  | 72 | 7.040  | 16.265 | -0.288 |
| N  | 73 | 5.175  | 18.064 | 1.863  |
| O  | 74 | 3.093  | 19.533 | 7.672  |
| O  | 75 | 2.235  | 23.460 | 6.638  |
| O  | 76 | 4.316  | 16.238 | 0.772  |
| O  | 77 | 2.395  | 18.943 | 4.076  |
| S  | 78 | 7.425  | 16.801 | 3.791  |
| S  | 79 | 7.042  | 18.334 | 6.883  |
| S  | 80 | 6.824  | 22.585 | 7.352  |
| S  | 81 | 11.152 | 21.393 | 2.381  |
| S  | 82 | 13.635 | 19.474 | 6.304  |
| S  | 83 | 10.738 | 17.954 | 7.874  |
| S  | 84 | 10.551 | 18.510 | 4.318  |
| S  | 85 | 10.495 | 21.581 | 6.174  |
| S  | 86 | 7.681  | 20.755 | 3.982  |

86

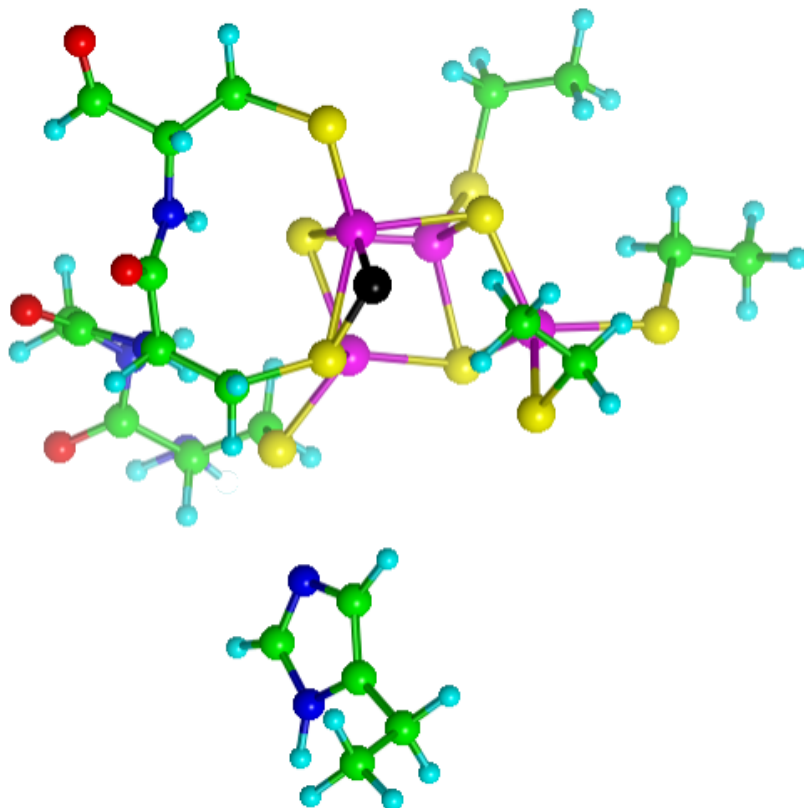

redv3nh19h4pbth\_1\_8777.43.cmmf

**TS: S19-Fe4**

|    |    |        |        |        |
|----|----|--------|--------|--------|
| C  | 1  | 11.079 | 10.043 | 9.234  |
| C  | 2  | 11.905 | 10.676 | 8.097  |
| C  | 3  | 11.119 | 11.580 | 7.203  |
| C  | 4  | 11.033 | 12.956 | 7.109  |
| C  | 5  | 9.643  | 12.211 | 5.653  |
| C  | 6  | 9.440  | 16.068 | 0.656  |
| C  | 7  | 7.519  | 17.492 | 5.701  |
| C  | 8  | 7.350  | 18.858 | 6.398  |
| C  | 9  | 8.838  | 16.816 | 6.101  |
| C  | 10 | 7.726  | 21.278 | 6.212  |
| C  | 11 | 6.376  | 21.971 | 6.053  |
| C  | 12 | 8.853  | 22.097 | 5.551  |
| C  | 13 | 14.934 | 22.344 | 1.395  |
| C  | 14 | 13.483 | 22.136 | 0.970  |
| C  | 15 | 18.089 | 19.132 | 1.288  |
| C  | 16 | 16.791 | 19.283 | 2.091  |
| C  | 17 | 14.044 | 17.977 | 7.894  |
| C  | 18 | 15.071 | 17.253 | 7.025  |
| C  | 19 | 8.098  | 15.548 | 0.143  |
| C  | 20 | 6.838  | 16.217 | 0.714  |
| C  | 21 | 5.952  | 17.942 | 2.227  |
| C  | 22 | 6.096  | 17.871 | 3.755  |
| H  | 23 | 11.344 | 18.656 | 6.104  |
| Fe | 24 | 12.445 | 19.413 | 2.526  |
| Fe | 25 | 14.271 | 17.848 | 3.892  |
| Fe | 26 | 10.941 | 17.381 | 3.235  |
| Fe | 27 | 11.047 | 19.628 | 4.853  |
| H  | 28 | 15.625 | 21.974 | 0.623  |
| H  | 29 | 15.143 | 23.415 | 1.576  |
| H  | 30 | 12.728 | 11.266 | 8.528  |
| H  | 31 | 5.019  | 17.433 | 1.955  |
| H  | 32 | 11.610 | 13.701 | 7.654  |
| H  | 33 | 11.702 | 9.382  | 9.859  |
| H  | 34 | 10.650 | 10.824 | 9.878  |
| H  | 35 | 10.244 | 9.443  | 8.838  |
| H  | 36 | 8.921  | 12.131 | 4.843  |
| H  | 37 | 12.384 | 9.877  | 7.504  |
| H  | 38 | 10.251 | 15.558 | 0.111  |
| H  | 39 | 8.033  | 17.086 | 3.653  |
| H  | 40 | 9.563  | 17.142 | 0.449  |
| H  | 41 | 8.756  | 23.139 | 5.883  |
| H  | 42 | 8.745  | 22.070 | 4.452  |
| H  | 43 | 7.925  | 21.214 | 7.294  |
| H  | 44 | 5.654  | 21.448 | 5.374  |
| H  | 45 | 6.714  | 16.887 | 6.157  |
| H  | 46 | 8.909  | 16.836 | 7.197  |
| H  | 47 | 8.837  | 15.761 | 5.786  |
| H  | 48 | 18.083 | 18.193 | 0.714  |
| H  | 49 | 8.003  | 14.497 | 0.482  |
| H  | 50 | 5.836  | 19.011 | 1.984  |
| H  | 51 | 18.202 | 19.974 | 0.581  |
| H  | 52 | 13.299 | 17.270 | 8.290  |
| H  | 53 | 7.969  | 17.674 | 1.610  |
| H  | 54 | 13.509 | 18.733 | 7.301  |
| H  | 55 | 7.104  | 15.297 | -1.620 |
| H  | 56 | 14.532 | 18.487 | 8.745  |
| H  | 57 | 8.732  | 15.094 | -1.755 |
| H  | 58 | 15.614 | 16.500 | 7.619  |
| H  | 59 | 15.814 | 17.960 | 6.622  |
| H  | 60 | 18.968 | 19.115 | 1.953  |
| H  | 61 | 16.812 | 20.232 | 2.648  |
| H  | 62 | 15.923 | 19.318 | 1.419  |
| H  | 63 | 12.797 | 22.487 | 1.754  |
| H  | 64 | 13.260 | 22.712 | 0.055  |
| H  | 65 | 8.194  | 19.778 | 4.776  |
| H  | 66 | 15.135 | 21.794 | 2.324  |

|   |    |        |        |        |
|---|----|--------|--------|--------|
| H | 67 | 10.055 | 10.144 | 6.013  |
| N | 68 | 10.211 | 11.116 | 6.257  |
| N | 69 | 10.114 | 13.334 | 6.154  |
| N | 70 | 7.698  | 19.941 | 5.655  |
| N | 71 | 7.316  | 17.528 | 4.256  |
| N | 72 | 8.010  | 15.680 | -1.330 |
| N | 73 | 7.015  | 17.352 | 1.445  |
| O | 74 | 6.947  | 18.918 | 7.565  |
| O | 75 | 6.082  | 23.021 | 6.605  |
| O | 76 | 5.724  | 15.717 | 0.485  |
| O | 77 | 5.136  | 18.202 | 4.462  |
| S | 78 | 9.651  | 15.703 | 2.467  |
| S | 79 | 10.545 | 17.325 | 5.447  |
| S | 80 | 10.535 | 21.511 | 6.028  |
| S | 81 | 13.098 | 20.367 | 0.567  |
| S | 82 | 16.530 | 17.925 | 3.326  |
| S | 83 | 14.298 | 16.338 | 5.610  |
| S | 84 | 12.963 | 17.197 | 2.208  |
| S | 85 | 13.352 | 19.907 | 4.496  |
| S | 86 | 10.162 | 19.516 | 2.800  |

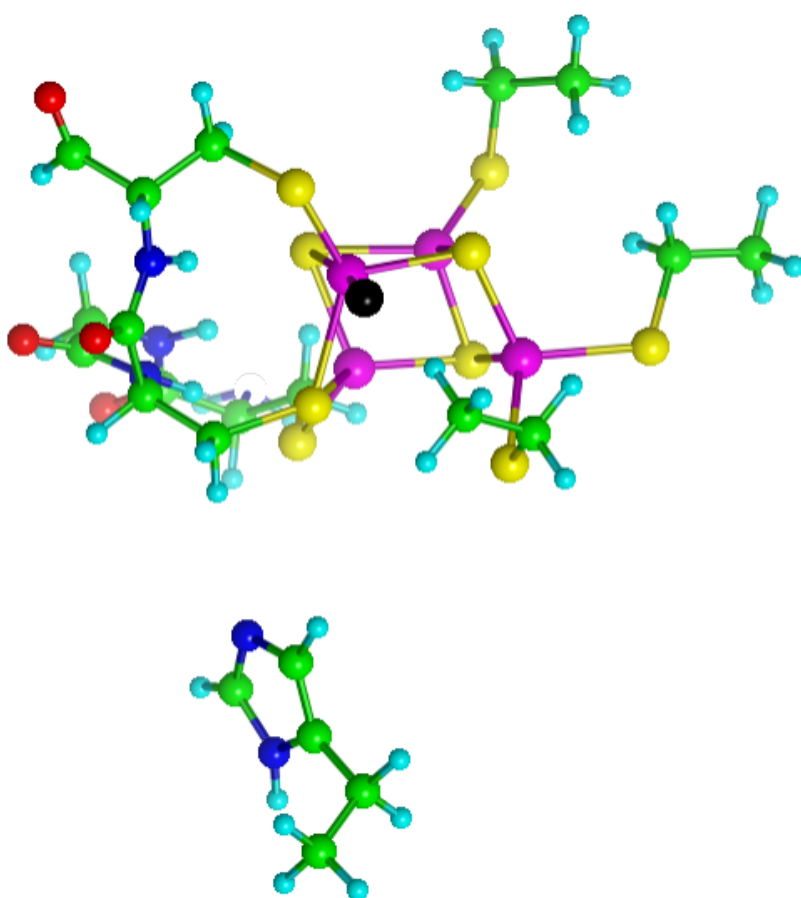

redv318nh19hdpb\_5.cmmf

**Fe4-H**

|    |    |        |        |        |
|----|----|--------|--------|--------|
| 86 |    |        |        |        |
| C  | 1  | 8.954  | 6.910  | 13.609 |
| C  | 2  | 9.728  | 7.989  | 12.833 |
| C  | 3  | 8.858  | 8.981  | 12.134 |
| C  | 4  | 8.526  | 10.291 | 12.415 |
| C  | 5  | 7.434  | 9.812  | 10.629 |
| C  | 6  | 8.668  | 15.100 | 7.051  |
| C  | 7  | 5.804  | 15.097 | 11.808 |
| C  | 8  | 5.497  | 16.294 | 12.732 |
| C  | 9  | 7.056  | 14.324 | 12.254 |
| C  | 10 | 5.788  | 18.713 | 13.057 |
| C  | 11 | 4.516  | 19.474 | 12.711 |
| C  | 12 | 7.034  | 19.608 | 12.875 |
| C  | 13 | 13.515 | 20.766 | 10.501 |
| C  | 14 | 12.180 | 20.681 | 9.772  |
| C  | 15 | 16.754 | 17.661 | 10.115 |
| C  | 16 | 15.317 | 17.611 | 10.633 |
| C  | 17 | 11.560 | 14.758 | 15.208 |
| C  | 18 | 12.789 | 14.420 | 14.366 |
| C  | 19 | 7.488  | 14.715 | 6.160  |
| C  | 20 | 6.103  | 15.226 | 6.585  |
| C  | 21 | 4.817  | 16.384 | 8.333  |
| C  | 22 | 4.696  | 15.928 | 9.792  |
| H  | 23 | 9.744  | 16.852 | 13.740 |
| Fe | 24 | 11.021 | 17.709 | 10.229 |
| Fe | 25 | 12.577 | 15.777 | 11.407 |
| Fe | 26 | 9.576  | 15.595 | 10.170 |
| Fe | 27 | 9.454  | 17.262 | 12.304 |
| H  | 28 | 14.356 | 20.665 | 9.798  |
| H  | 29 | 13.613 | 21.733 | 11.030 |
| H  | 30 | 10.376 | 8.548  | 13.525 |
| H  | 31 | 4.000  | 15.929 | 7.758  |
| H  | 32 | 8.909  | 10.917 | 13.218 |
| H  | 33 | 9.640  | 6.207  | 14.106 |
| H  | 34 | 8.313  | 7.371  | 14.375 |
| H  | 35 | 8.300  | 6.326  | 12.942 |
| H  | 36 | 6.811  | 9.861  | 9.740  |
| H  | 37 | 10.411 | 7.506  | 12.110 |
| H  | 38 | 9.601  | 14.765 | 6.575  |
| H  | 39 | 6.646  | 15.163 | 9.836  |
| H  | 40 | 8.754  | 16.190 | 7.167  |
| H  | 41 | 6.841  | 20.555 | 13.400 |
| H  | 42 | 7.198  | 19.822 | 11.807 |
| H  | 43 | 5.715  | 18.423 | 14.118 |
| H  | 44 | 3.961  | 19.078 | 11.824 |

|  |   |    |        |        |        |
|--|---|----|--------|--------|--------|
|  | H | 45 | 4.955  | 14.418 | 11.994 |
|  | H | 46 | 6.904  | 14.094 | 13.318 |
|  | H | 47 | 7.105  | 13.367 | 11.714 |
|  | H | 48 | 16.904 | 16.927 | 9.308  |
|  | H | 49 | 7.378  | 13.612 | 6.226  |
|  | H | 50 | 4.650  | 17.474 | 8.342  |
|  | H | 51 | 16.993 | 18.666 | 9.721  |
|  | H | 52 | 10.874 | 13.899 | 15.267 |
|  | H | 53 | 6.931  | 16.282 | 8.133  |
|  | H | 54 | 11.002 | 15.592 | 14.762 |
|  | H | 55 | 6.845  | 14.957 | 4.251  |
|  | H | 56 | 11.860 | 15.043 | 16.234 |
|  | H | 57 | 8.459  | 14.640 | 4.353  |
|  | H | 58 | 13.355 | 13.590 | 14.820 |
|  | H | 59 | 13.469 | 15.281 | 14.298 |
|  | H | 60 | 17.468 | 17.424 | 10.920 |
|  | H | 61 | 15.179 | 18.366 | 11.421 |
|  | H | 62 | 14.605 | 17.848 | 9.829  |
|  | H | 63 | 11.346 | 20.749 | 10.484 |
|  | H | 64 | 12.069 | 21.511 | 9.056  |
|  | H | 65 | 6.562  | 17.513 | 11.485 |
|  | H | 66 | 13.590 | 19.961 | 11.243 |
|  | H | 67 | 8.190  | 7.821  | 10.455 |
|  | N | 68 | 8.139  | 8.686  | 10.981 |
|  | N | 69 | 7.640  | 10.792 | 11.484 |
|  | N | 70 | 5.902  | 17.506 | 12.267 |
|  | N | 71 | 5.821  | 15.445 | 10.391 |
|  | N | 72 | 7.699  | 15.181 | 4.772  |
|  | N | 73 | 6.055  | 16.057 | 7.659  |
|  | O | 74 | 4.922  | 16.120 | 13.812 |
|  | O | 75 | 4.109  | 20.445 | 13.334 |
|  | O | 76 | 5.098  | 14.874 | 5.945  |
|  | O | 77 | 3.619  | 16.092 | 10.379 |
|  | S | 78 | 8.561  | 14.259 | 8.704  |
|  | S | 79 | 8.828  | 14.938 | 12.185 |
|  | S | 80 | 8.532  | 18.839 | 13.617 |
|  | S | 81 | 11.999 | 19.125 | 8.784  |
|  | S | 82 | 14.884 | 15.963 | 11.347 |
|  | S | 83 | 12.376 | 13.876 | 12.645 |
|  | S | 84 | 11.679 | 15.735 | 9.373  |
|  | S | 85 | 11.672 | 17.684 | 12.341 |
|  | S | 86 | 8.749  | 17.697 | 10.150 |
|  |   | 86 |        |        |        |
|  | C | 1  | 10.249 | 5.696  | 13.054 |
|  | C | 2  | 11.417 | 6.353  | 12.296 |
|  | C | 3  | 11.073 | 7.653  | 11.645 |
|  | C | 4  | 11.407 | 8.959  | 11.940 |
|  | C | 5  | 10.113 | 9.092  | 10.234 |
|  | C | 6  | 10.779 | 13.755 | 6.476  |
|  | C | 7  | 8.081  | 14.086 | 11.322 |
|  | C | 8  | 7.896  | 15.159 | 12.409 |
|  | C | 9  | 9.265  | 13.162 | 11.654 |
|  | C | 10 | 8.553  | 17.398 | 13.173 |
|  | C | 11 | 7.279  | 18.234 | 13.166 |
|  | C | 12 | 9.787  | 18.293 | 12.936 |
|  | C | 13 | 16.640 | 18.839 | 9.607  |
|  | C | 14 | 15.233 | 18.913 | 9.020  |
|  | C | 15 | 19.438 | 15.365 | 9.002  |
|  | C | 16 | 18.037 | 15.492 | 9.613  |
|  | C | 17 | 14.272 | 13.074 | 14.424 |
|  | C | 18 | 15.367 | 12.462 | 13.555 |
|  | C | 19 | 9.508  | 13.618 | 5.640  |
|  | C | 20 | 8.239  | 14.289 | 6.193  |
|  | C | 21 | 7.285  | 15.741 | 7.939  |
|  | C | 22 | 7.109  | 15.253 | 9.388  |

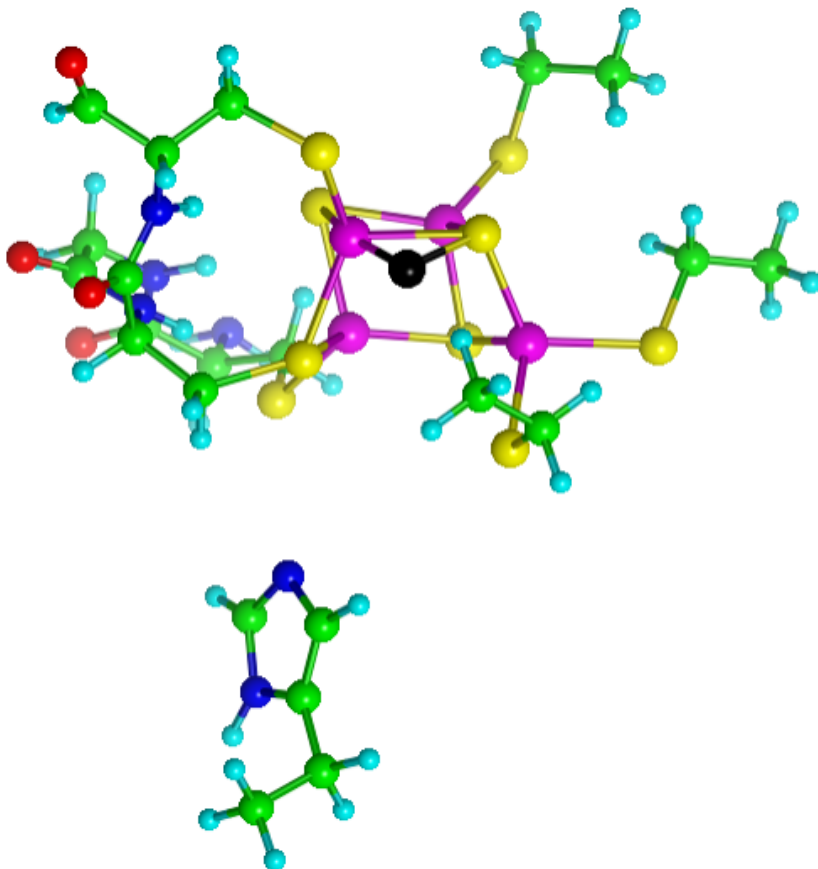

redv3423pbtj\_1\_8779.17.cmmf  
**TS: Fe4-S3**

|    |    |        |        |        |
|----|----|--------|--------|--------|
| H  | 23 | 12.948 | 15.312 | 12.697 |
| Fe | 24 | 13.641 | 16.092 | 9.547  |
| Fe | 25 | 15.116 | 14.009 | 10.624 |
| Fe | 26 | 11.895 | 14.173 | 9.566  |
| Fe | 27 | 11.914 | 15.900 | 11.671 |
| H  | 28 | 17.381 | 18.607 | 8.827  |
| H  | 29 | 16.922 | 19.794 | 10.090 |
| H  | 30 | 12.242 | 6.547  | 12.997 |
| H  | 31 | 6.370  | 15.492 | 7.390  |
| H  | 32 | 12.075 | 9.320  | 12.718 |
| H  | 33 | 10.565 | 4.754  | 13.528 |
| H  | 34 | 9.868  | 6.369  | 13.836 |
| H  | 35 | 9.409  | 5.467  | 12.380 |
| H  | 36 | 9.530  | 9.458  | 9.391  |
| H  | 37 | 11.815 | 5.642  | 11.550 |
| H  | 38 | 11.603 | 13.249 | 5.947  |
| H  | 39 | 8.928  | 14.240 | 9.365  |
| H  | 40 | 11.080 | 14.806 | 6.582  |
| H  | 41 | 9.726  | 19.138 | 13.635 |
| H  | 42 | 9.777  | 18.691 | 11.909 |
| H  | 43 | 8.639  | 16.941 | 14.171 |
| H  | 44 | 6.649  | 18.113 | 12.250 |
| H  | 45 | 7.168  | 13.474 | 11.418 |
| H  | 46 | 9.098  | 12.785 | 12.672 |
| H  | 47 | 9.257  | 12.297 | 10.977 |
| H  | 48 | 19.455 | 14.588 | 8.221  |
| H  | 49 | 9.238  | 12.544 | 5.610  |
| H  | 50 | 7.359  | 16.839 | 7.993  |
| H  | 51 | 19.744 | 16.324 | 8.547  |
| H  | 52 | 13.384 | 12.426 | 14.460 |
| H  | 53 | 9.344  | 15.368 | 7.546  |
| H  | 54 | 13.950 | 14.041 | 14.016 |
| H  | 55 | 8.871  | 14.013 | 3.738  |
| H  | 56 | 14.633 | 13.238 | 15.456 |
| H  | 57 | 10.474 | 13.659 | 3.825  |
| H  | 58 | 15.699 | 11.500 | 13.979 |
| H  | 59 | 16.247 | 13.118 | 13.502 |
| H  | 60 | 20.183 | 15.090 | 9.766  |
| H  | 61 | 18.041 | 16.286 | 10.372 |
| H  | 62 | 17.304 | 15.777 | 8.846  |
| H  | 63 | 14.491 | 19.104 | 9.806  |
| H  | 64 | 15.160 | 19.739 | 8.291  |
| H  | 65 | 9.113  | 16.423 | 11.360 |
| H  | 66 | 16.686 | 18.046 | 10.365 |
| H  | 67 | 9.812  | 6.984  | 10.035 |
| N  | 68 | 10.232 | 7.756  | 10.540 |
| N  | 69 | 10.804 | 9.839  | 11.068 |
| N  | 70 | 8.489  | 16.357 | 12.166 |
| N  | 71 | 8.163  | 14.604 | 9.957  |
| N  | 72 | 9.722  | 14.182 | 4.282  |
| N  | 73 | 8.402  | 15.198 | 7.193  |
| O  | 74 | 7.281  | 14.900 | 13.450 |
| O  | 75 | 6.959  | 18.999 | 14.065 |
| O  | 76 | 7.134  | 13.998 | 5.705  |
| O  | 77 | 6.061  | 15.529 | 9.988  |
| S  | 78 | 10.619 | 12.965 | 8.152  |
| S  | 79 | 11.073 | 13.698 | 11.634 |
| S  | 80 | 11.386 | 17.424 | 13.255 |
| S  | 81 | 14.773 | 17.368 | 8.101  |
| S  | 82 | 17.436 | 13.944 | 10.436 |
| S  | 83 | 14.812 | 12.099 | 11.826 |
| S  | 84 | 13.995 | 14.023 | 8.699  |
| S  | 85 | 14.309 | 15.941 | 11.676 |
| S  | 86 | 11.395 | 16.418 | 9.514  |

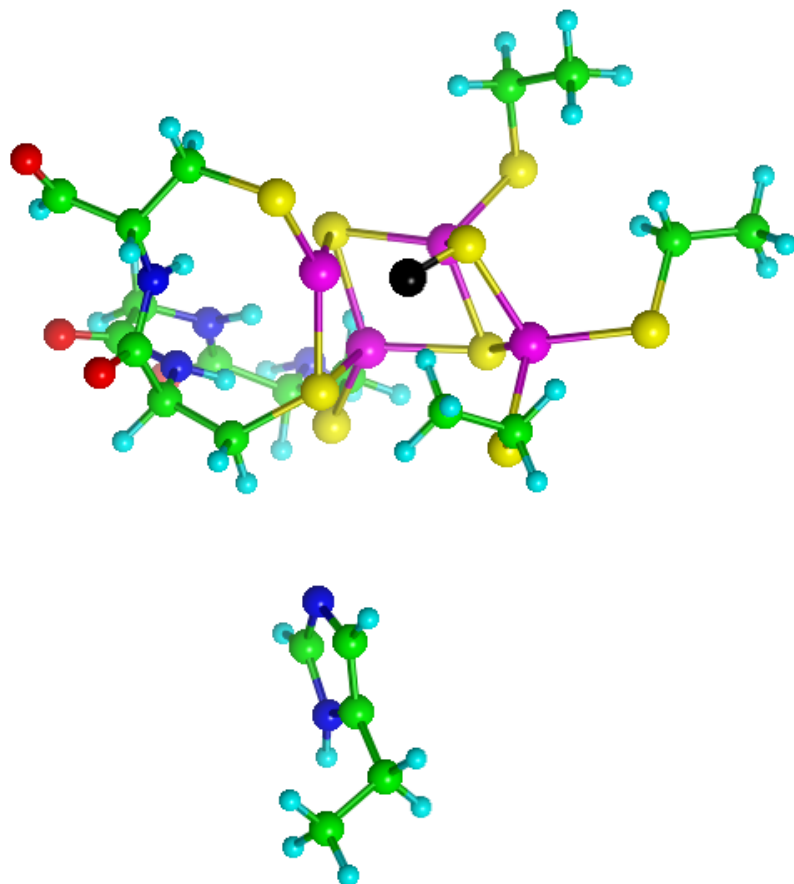

redv318nh19hepb\_4.cmmf  
**S3-H**

|    |    |        |        |        |
|----|----|--------|--------|--------|
| C  | 1  | 6.242  | 6.380  | 15.120 |
| C  | 2  | 7.345  | 7.336  | 14.632 |
| C  | 3  | 6.826  | 8.547  | 13.929 |
| C  | 4  | 6.692  | 9.867  | 14.315 |
| C  | 5  | 5.868  | 9.783  | 12.336 |
| C  | 6  | 6.654  | 14.858 | 8.858  |
| C  | 7  | 3.225  | 14.420 | 13.215 |
| C  | 8  | 2.662  | 15.370 | 14.284 |
| C  | 9  | 4.481  | 13.704 | 13.738 |
| C  | 10 | 2.619  | 17.672 | 15.143 |
| C  | 11 | 1.241  | 18.247 | 14.840 |
| C  | 12 | 3.665  | 18.800 | 15.219 |
| C  | 13 | 10.882 | 20.553 | 13.539 |
| C  | 14 | 9.715  | 20.329 | 12.583 |
| C  | 15 | 14.274 | 17.592 | 13.480 |
| C  | 16 | 12.798 | 17.445 | 13.835 |
| C  | 17 | 8.511  | 14.206 | 17.563 |
| C  | 18 | 9.836  | 13.822 | 16.912 |
| C  | 19 | 5.559  | 14.570 | 7.833  |
| C  | 20 | 4.158  | 15.111 | 8.151  |
| C  | 21 | 2.735  | 16.195 | 9.837  |
| C  | 22 | 2.403  | 15.572 | 11.202 |
| H  | 23 | 7.790  | 16.711 | 15.540 |
| Fe | 24 | 8.536  | 17.340 | 12.743 |
| Fe | 25 | 10.114 | 15.484 | 14.128 |
| Fe | 26 | 7.019  | 15.412 | 12.078 |
| Fe | 27 | 6.116  | 16.852 | 14.165 |
| H  | 28 | 11.841 | 20.520 | 13.000 |
| H  | 29 | 10.794 | 21.534 | 14.042 |
| H  | 30 | 7.940  | 7.678  | 15.492 |
| H  | 31 | 1.973  | 15.863 | 9.123  |
| H  | 32 | 7.026  | 10.328 | 15.242 |
| H  | 33 | 6.666  | 5.501  | 15.630 |
| H  | 34 | 5.567  | 6.897  | 15.818 |
| H  | 35 | 5.627  | 6.019  | 14.280 |
| H  | 36 | 5.433  | 10.044 | 11.374 |
| H  | 37 | 8.047  | 6.784  | 13.981 |
| H  | 38 | 7.619  | 14.508 | 8.460  |
| H  | 39 | 4.331  | 14.807 | 11.431 |
| H  | 40 | 6.765  | 15.939 | 9.029  |
| H  | 41 | 3.298  | 19.540 | 15.944 |
| H  | 42 | 3.755  | 19.296 | 14.240 |
| H  | 43 | 2.563  | 17.169 | 16.121 |
| H  | 44 | 0.858  | 18.012 | 13.815 |
| H  | 45 | 2.442  | 13.648 | 13.123 |
| H  | 46 | 4.218  | 13.275 | 14.713 |
| H  | 47 | 4.749  | 12.870 | 13.076 |
| H  | 48 | 14.547 | 16.910 | 12.659 |
| H  | 49 | 5.409  | 13.469 | 7.819  |
| H  | 50 | 2.627  | 17.286 | 9.959  |
| H  | 51 | 14.495 | 18.626 | 13.159 |
| H  | 52 | 7.736  | 13.455 | 17.348 |
| H  | 53 | 4.854  | 16.008 | 9.855  |
| H  | 54 | 8.148  | 15.167 | 17.174 |
| H  | 55 | 5.140  | 14.945 | 5.878  |
| H  | 56 | 8.618  | 14.301 | 18.660 |
| H  | 57 | 6.723  | 14.575 | 6.144  |
| H  | 58 | 10.226 | 12.891 | 17.356 |
| H  | 59 | 10.596 | 14.604 | 17.063 |
| H  | 60 | 14.917 | 17.352 | 14.342 |
| H  | 61 | 12.534 | 18.147 | 14.641 |
| H  | 62 | 12.165 | 17.692 | 12.971 |
| H  | 63 | 8.763  | 20.315 | 13.133 |
| H  | 64 | 9.653  | 21.144 | 11.844 |
| H  | 65 | 3.562  | 16.965 | 13.356 |
| H  | 66 | 10.905 | 19.775 | 14.314 |

|   |    |        |        |        |
|---|----|--------|--------|--------|
| H | 67 | 6.256  | 7.702  | 12.036 |
| N | 68 | 6.285  | 8.511  | 12.648 |
| N | 69 | 6.095  | 10.618 | 13.328 |
| N | 70 | 2.990  | 16.683 | 14.152 |
| N | 71 | 3.441  | 15.040 | 11.909 |
| N | 72 | 5.932  | 15.111 | 6.507  |
| N | 73 | 4.026  | 15.868 | 9.273  |
| O | 74 | 2.005  | 14.924 | 15.231 |
| O | 75 | 0.594  | 18.928 | 15.622 |
| O | 76 | 3.211  | 14.839 | 7.393  |
| O | 77 | 1.245  | 15.650 | 11.632 |
| S | 78 | 6.355  | 13.952 | 10.451 |
| S | 79 | 6.114  | 14.579 | 14.019 |
| S | 80 | 5.325  | 18.231 | 15.781 |
| S | 81 | 9.883  | 18.757 | 11.618 |
| S | 82 | 12.378 | 15.738 | 14.412 |
| S | 83 | 9.656  | 13.505 | 15.100 |
| S | 84 | 9.303  | 15.338 | 12.104 |
| S | 85 | 8.916  | 17.351 | 15.055 |
| S | 86 | 6.359  | 17.595 | 12.085 |

**Table S3.** Pictures and coordinates for some other relevant calculated structures

|                                                                                    |    |        |        |        |
|------------------------------------------------------------------------------------|----|--------|--------|--------|
| 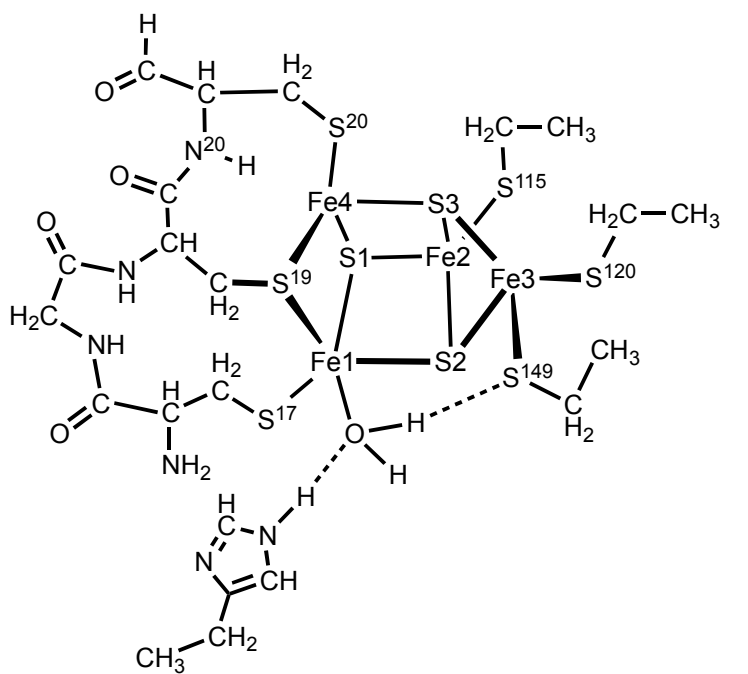 |    | 88     |        |        |
| C                                                                                  | 1  | 12.068 | 9.077  | 9.188  |
| C                                                                                  | 2  | 13.202 | 8.985  | 8.140  |
| C                                                                                  | 3  | 12.977 | 9.834  | 6.916  |
| C                                                                                  | 4  | 13.790 | 10.830 | 6.398  |
| C                                                                                  | 5  | 12.013 | 10.550 | 5.115  |
| C                                                                                  | 6  | 12.600 | 13.499 | -0.482 |
| C                                                                                  | 7  | 10.416 | 16.282 | 3.928  |
| C                                                                                  | 8  | 10.482 | 17.725 | 4.485  |
| C                                                                                  | 9  | 11.485 | 15.374 | 4.586  |
| C                                                                                  | 10 | 11.658 | 19.889 | 4.399  |
| C                                                                                  | 11 | 10.500 | 20.862 | 4.205  |
| C                                                                                  | 12 | 12.936 | 20.449 | 3.711  |
| C                                                                                  | 13 | 19.312 | 18.739 | -0.298 |
| C                                                                                  | 14 | 17.821 | 18.875 | -0.644 |
| C                                                                                  | 15 | 21.700 | 14.964 | 0.273  |
| C                                                                                  | 16 | 20.505 | 15.532 | 1.046  |
| C                                                                                  | 17 | 17.159 | 15.635 | 6.618  |
| C                                                                                  | 18 | 18.119 | 14.523 | 6.182  |
| C                                                                                  | 19 | 11.258 | 13.344 | -1.211 |
| C                                                                                  | 20 | 10.184 | 14.424 | -0.948 |
| C                                                                                  | 21 | 9.650  | 16.586 | 0.140  |
| C                                                                                  | 22 | 9.491  | 16.730 | 1.674  |
| H                                                                                  | 23 | 15.488 | 13.260 | 4.129  |
| H                                                                                  | 24 | 15.143 | 12.493 | 2.813  |
| H                                                                                  | 25 | 13.574 | 11.967 | 4.584  |
| Fe                                                                                 | 26 | 16.061 | 16.421 | 0.985  |
| Fe                                                                                 | 27 | 17.671 | 14.842 | 2.795  |
| Fe                                                                                 | 28 | 14.137 | 14.729 | 2.282  |
| Fe                                                                                 | 29 | 14.621 | 17.381 | 3.188  |
| H                                                                                  | 30 | 19.848 | 18.184 | -1.082 |
| H                                                                                  | 31 | 19.783 | 19.736 | -0.190 |
| H                                                                                  | 32 | 14.160 | 9.274  | 8.601  |
| H                                                                                  | 33 | 8.665  | 16.344 | -0.266 |
| H                                                                                  | 34 | 14.732 | 11.260 | 6.723  |
| H                                                                                  | 35 | 12.242 | 8.381  | 10.025 |
| H                                                                                  | 36 | 11.992 | 10.096 | 9.593  |
| H                                                                                  | 37 | 11.106 | 8.831  | 8.720  |
| H                                                                                  | 38 | 11.332 | 10.707 | 4.286  |
| H                                                                                  | 39 | 13.310 | 7.929  | 7.834  |
| H                                                                                  | 40 | 13.281 | 12.709 | -0.830 |
| H                                                                                  | 41 | 11.139 | 15.522 | 2.058  |

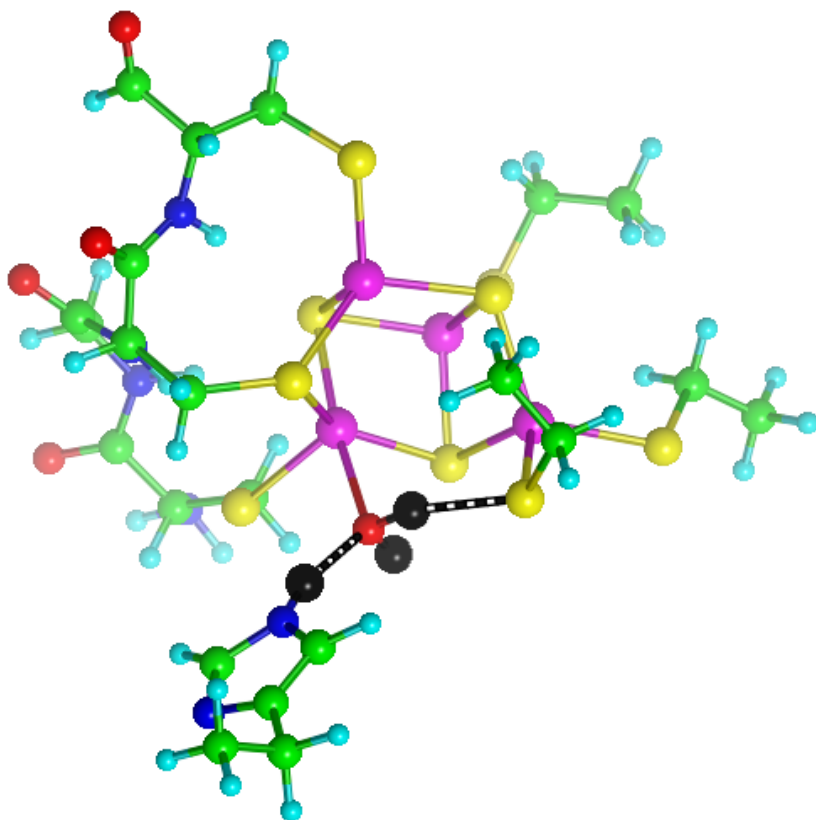

redv318n19oh2b\_5.cmmf

|   |    |        |        |        |
|---|----|--------|--------|--------|
| H | 42 | 13.086 | 14.451 | -0.724 |
| H | 43 | 13.073 | 21.478 | 4.064  |
| H | 44 | 12.790 | 20.475 | 2.621  |
| H | 45 | 11.851 | 19.807 | 5.477  |
| H | 46 | 9.795  | 20.588 | 3.383  |
| H | 47 | 9.436  | 15.918 | 4.270  |
| H | 48 | 11.334 | 15.442 | 5.670  |
| H | 49 | 11.290 | 14.342 | 4.275  |
| H | 50 | 21.451 | 13.980 | -0.153 |
| H | 51 | 10.785 | 12.416 | -0.843 |
| H | 52 | 9.941  | 17.580 | -0.233 |
| H | 53 | 22.002 | 15.634 | -0.555 |
| H | 54 | 16.185 | 15.227 | 6.922  |
| H | 55 | 11.570 | 15.684 | -0.078 |
| H | 56 | 16.981 | 16.336 | 5.795  |
| H | 57 | 10.557 | 13.100 | -3.129 |
| H | 58 | 17.579 | 16.201 | 7.471  |
| H | 59 | 12.087 | 12.526 | -2.917 |
| H | 60 | 18.312 | 13.828 | 7.015  |
| H | 61 | 19.083 | 14.947 | 5.869  |
| H | 62 | 22.569 | 14.825 | 0.938  |
| H | 63 | 20.763 | 16.516 | 1.460  |
| H | 64 | 19.654 | 15.671 | 0.372  |
| H | 65 | 17.284 | 19.355 | 0.183  |
| H | 66 | 17.691 | 19.503 | -1.540 |
| H | 67 | 11.978 | 18.178 | 3.162  |
| H | 68 | 19.433 | 18.198 | 0.646  |
| N | 69 | 11.860 | 9.664  | 6.103  |
| N | 70 | 13.162 | 11.280 | 5.251  |
| N | 71 | 11.325 | 18.578 | 3.839  |
| N | 72 | 10.462 | 16.185 | 2.460  |
| N | 73 | 11.463 | 13.309 | -2.699 |
| N | 74 | 10.588 | 15.579 | -0.342 |
| O | 75 | 9.827  | 18.041 | 5.493  |
| O | 76 | 10.352 | 21.901 | 4.845  |
| O | 77 | 14.707 | 12.944 | 3.567  |
| O | 78 | 9.008  | 14.217 | -1.312 |
| O | 79 | 8.531  | 17.391 | 2.111  |
| S | 80 | 12.433 | 13.320 | 1.376  |
| S | 81 | 13.361 | 15.595 | 4.356  |
| S | 82 | 14.499 | 19.512 | 4.131  |
| S | 83 | 16.996 | 17.234 | -1.021 |
| S | 84 | 19.987 | 14.414 | 2.449  |
| S | 85 | 17.520 | 13.479 | 4.743  |
| S | 86 | 16.176 | 14.127 | 1.109  |
| S | 87 | 16.961 | 17.127 | 2.955  |
| S | 88 | 13.774 | 16.754 | 1.150  |

|    |    |        |        |        |
|----|----|--------|--------|--------|
| 88 |    |        |        |        |
| C  | 1  | 12.147 | 5.501  | 9.507  |
| C  | 2  | 13.180 | 4.603  | 8.782  |
| C  | 3  | 13.740 | 5.304  | 7.575  |
| C  | 4  | 14.800 | 6.191  | 7.534  |
| C  | 5  | 13.755 | 6.181  | 5.596  |
| C  | 6  | 13.598 | 12.102 | 2.410  |
| C  | 7  | 12.786 | 12.879 | 8.011  |
| C  | 8  | 13.105 | 13.932 | 9.102  |
| C  | 9  | 13.840 | 11.741 | 7.983  |
| C  | 10 | 14.389 | 15.969 | 9.666  |
| C  | 11 | 13.316 | 16.975 | 10.067 |
| C  | 12 | 15.592 | 16.732 | 9.034  |
| C  | 13 | 21.360 | 15.906 | 3.845  |
| C  | 14 | 19.968 | 16.371 | 3.391  |
| C  | 15 | 23.311 | 11.981 | 2.817  |
| C  | 16 | 21.924 | 12.249 | 3.399  |
| C  | 17 | 19.398 | 10.777 | 9.495  |



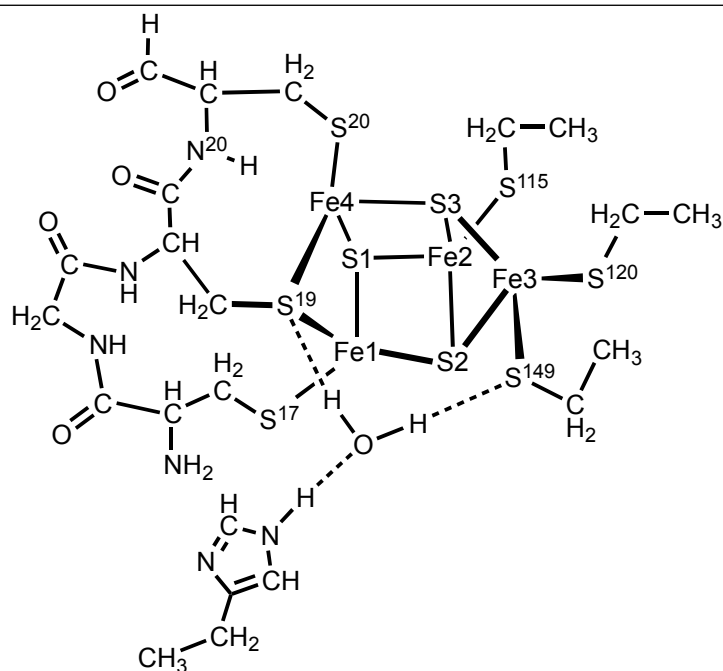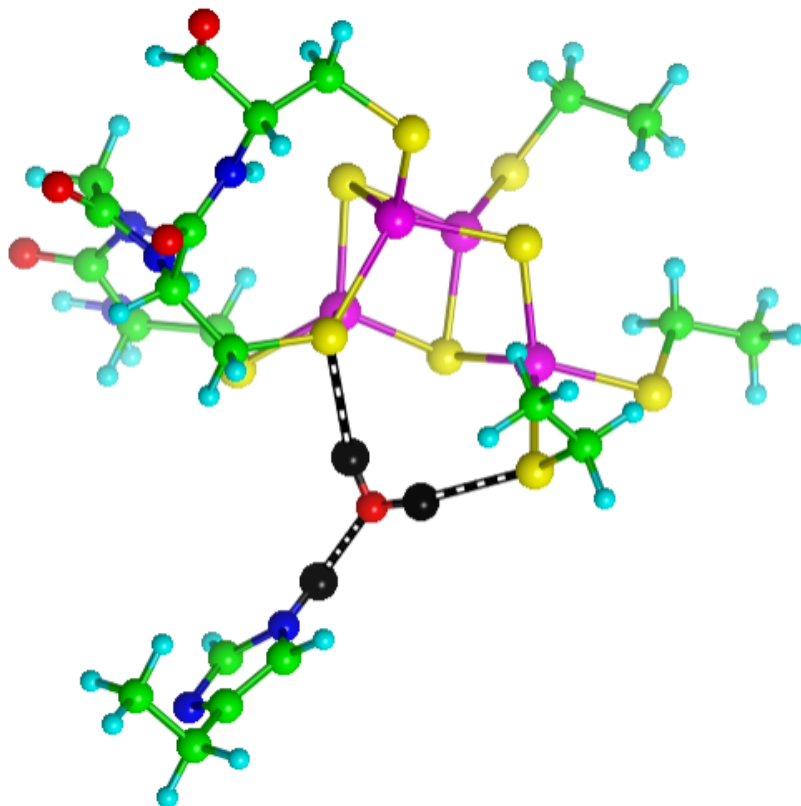

redv318noh2bb\_7.cmmf

|    |    |        |        |        |
|----|----|--------|--------|--------|
| C  | 18 | 20.261 | 10.023 | 8.484  |
| C  | 19 | 12.088 | 12.235 | 2.154  |
| C  | 20 | 11.323 | 13.316 | 2.953  |
| C  | 21 | 11.408 | 14.809 | 4.937  |
| C  | 22 | 11.529 | 14.281 | 6.387  |
| H  | 23 | 17.286 | 9.015  | 6.568  |
| H  | 24 | 16.019 | 9.810  | 6.184  |
| H  | 25 | 15.422 | 7.561  | 6.024  |
| Fe | 26 | 18.046 | 13.901 | 4.550  |
| Fe | 27 | 19.376 | 11.539 | 5.551  |
| Fe | 28 | 15.824 | 12.468 | 5.025  |
| Fe | 29 | 16.832 | 14.156 | 7.037  |
| H  | 30 | 21.269 | 15.182 | 4.662  |
| H  | 31 | 21.963 | 16.760 | 4.211  |
| H  | 32 | 13.995 | 4.342  | 9.477  |
| H  | 33 | 10.344 | 14.882 | 4.700  |
| H  | 34 | 15.525 | 6.503  | 8.275  |
| H  | 35 | 11.706 | 4.991  | 10.380 |
| H  | 36 | 12.618 | 6.433  | 9.845  |
| H  | 37 | 11.332 | 5.767  | 8.820  |
| H  | 38 | 13.505 | 6.459  | 4.577  |
| H  | 39 | 12.698 | 3.661  | 8.478  |
| H  | 40 | 14.018 | 11.395 | 1.683  |
| H  | 41 | 13.082 | 12.986 | 5.897  |
| H  | 42 | 14.112 | 13.059 | 2.265  |
| H  | 43 | 15.871 | 17.533 | 9.730  |
| H  | 44 | 15.277 | 17.192 | 8.085  |
| H  | 45 | 14.736 | 15.453 | 10.570 |
| H  | 46 | 12.490 | 17.087 | 9.325  |
| H  | 47 | 11.846 | 12.426 | 8.360  |
| H  | 48 | 13.940 | 11.377 | 9.012  |
| H  | 49 | 13.448 | 10.925 | 7.365  |
| H  | 50 | 23.361 | 10.972 | 2.377  |
| H  | 51 | 11.621 | 11.290 | 2.493  |
| H  | 52 | 11.834 | 15.824 | 4.940  |
| H  | 53 | 23.570 | 12.713 | 2.029  |
| H  | 54 | 18.517 | 10.184 | 9.782  |
| H  | 55 | 13.010 | 13.727 | 4.030  |
| H  | 56 | 19.036 | 11.722 | 9.072  |
| H  | 57 | 10.800 | 12.640 | 0.619  |
| H  | 58 | 19.976 | 11.006 | 10.410 |
| H  | 59 | 12.052 | 11.657 | 0.175  |
| H  | 60 | 20.622 | 9.073  | 8.910  |
| H  | 61 | 21.138 | 10.619 | 8.200  |
| H  | 62 | 24.082 | 12.035 | 3.603  |
| H  | 63 | 21.888 | 13.246 | 3.840  |
| H  | 64 | 21.158 | 12.223 | 2.614  |
| H  | 65 | 19.426 | 16.820 | 4.233  |
| H  | 66 | 20.060 | 17.142 | 2.608  |
| H  | 67 | 21.901 | 15.430 | 3.016  |
| H  | 68 | 14.275 | 14.970 | 7.777  |
| N  | 69 | 13.090 | 5.294  | 6.345  |
| N  | 70 | 14.804 | 6.742  | 6.268  |
| N  | 71 | 12.567 | 13.440 | 6.664  |
| N  | 72 | 13.856 | 14.998 | 8.709  |
| N  | 73 | 11.813 | 12.499 | 0.705  |
| N  | 74 | 12.036 | 14.006 | 3.890  |
| O  | 75 | 12.712 | 13.762 | 10.269 |
| O  | 76 | 13.352 | 17.666 | 11.085 |
| O  | 77 | 16.395 | 8.903  | 6.139  |
| O  | 78 | 10.109 | 13.508 | 2.730  |
| O  | 79 | 10.732 | 14.706 | 7.241  |
| S  | 80 | 13.951 | 11.414 | 4.131  |
| S  | 81 | 15.616 | 12.007 | 7.350  |
| S  | 82 | 17.113 | 15.677 | 8.755  |
| S  | 83 | 18.924 | 14.997 | 2.661  |

|   |    |        |        |       |
|---|----|--------|--------|-------|
| S | 84 | 21.509 | 10.992 | 4.704 |
| S | 85 | 19.372 | 9.582  | 6.899 |
| S | 86 | 17.756 | 11.653 | 3.990 |
| S | 87 | 19.148 | 13.690 | 6.532 |
| S | 88 | 15.940 | 14.811 | 5.048 |

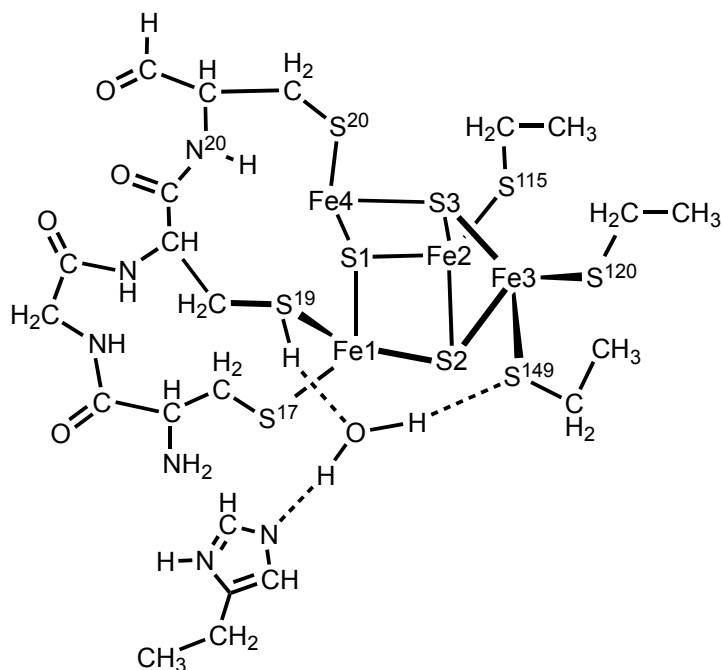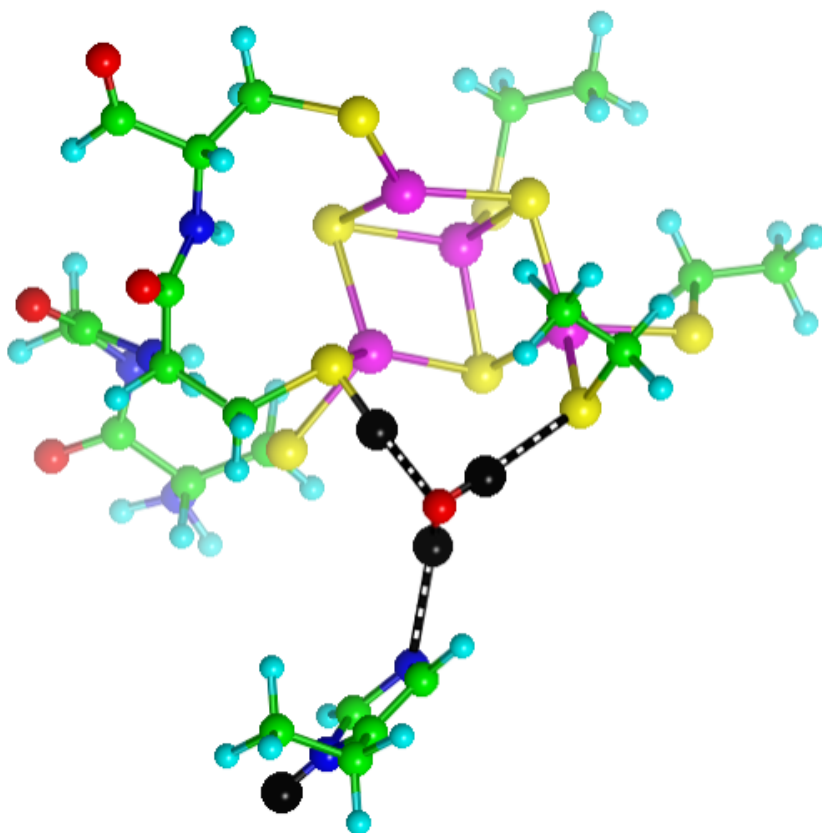

sepv318nhoh2epb\_6.cmmf

|    |    |    |        |        |        |
|----|----|----|--------|--------|--------|
| 89 | C  | 1  | 8.816  | 11.630 | 7.433  |
|    | C  | 2  | 10.166 | 11.144 | 6.881  |
|    | C  | 3  | 10.435 | 11.602 | 5.486  |
|    | C  | 4  | 11.330 | 12.534 | 5.010  |
|    | C  | 5  | 10.160 | 11.965 | 3.301  |
|    | C  | 6  | 8.683  | 16.498 | -1.034 |
|    | C  | 7  | 6.925  | 17.959 | 3.973  |
|    | C  | 8  | 6.934  | 19.285 | 4.761  |
|    | C  | 9  | 8.184  | 17.121 | 4.243  |
|    | C  | 10 | 7.507  | 21.657 | 4.775  |
|    | C  | 11 | 6.098  | 22.247 | 4.883  |
|    | C  | 12 | 8.443  | 22.627 | 4.031  |
|    | C  | 13 | 14.279 | 22.785 | -0.988 |
|    | C  | 14 | 12.887 | 22.471 | -1.527 |
|    | C  | 15 | 17.526 | 19.666 | -0.989 |
|    | C  | 16 | 16.097 | 19.492 | -0.478 |
|    | C  | 17 | 13.798 | 18.918 | 5.858  |
|    | C  | 18 | 14.846 | 18.247 | 4.981  |
|    | C  | 19 | 7.292  | 15.938 | -1.340 |
|    | C  | 20 | 6.089  | 16.783 | -0.892 |
|    | C  | 21 | 5.356  | 18.650 | 0.536  |
|    | C  | 22 | 5.517  | 18.598 | 2.065  |
|    | H  | 23 | 12.449 | 16.047 | 4.343  |
|    | H  | 24 | 10.568 | 16.865 | 4.142  |
|    | H  | 25 | 8.921  | 10.578 | 4.343  |
|    | H  | 26 | 11.540 | 14.846 | 3.911  |
|    | Fe | 27 | 12.023 | 20.057 | 0.379  |
|    | Fe | 28 | 13.854 | 18.603 | 1.824  |
|    | Fe | 29 | 10.425 | 18.206 | 1.418  |
|    | Fe | 30 | 11.006 | 20.986 | 2.598  |
|    | H  | 31 | 14.392 | 22.384 | 0.028  |
|    | H  | 32 | 14.446 | 23.878 | -0.950 |
|    | H  | 33 | 10.976 | 11.554 | 7.505  |
|    | H  | 34 | 4.379  | 18.213 | 0.291  |
|    | H  | 35 | 12.054 | 13.114 | 5.578  |
|    | H  | 36 | 8.698  | 11.362 | 8.494  |
|    | H  | 37 | 8.738  | 12.723 | 7.341  |
|    | H  | 38 | 7.968  | 11.192 | 6.883  |
|    | H  | 39 | 9.726  | 11.895 | 2.308  |
|    | H  | 40 | 10.240 | 10.044 | 6.967  |
|    | H  | 41 | 9.436  | 15.852 | -1.510 |
|    | H  | 42 | 7.373  | 17.644 | 1.899  |
|    | H  | 43 | 8.815  | 17.502 | -1.465 |
|    | H  | 44 | 8.242  | 23.625 | 4.441  |
|    | H  | 45 | 8.198  | 22.649 | 2.957  |
|    | H  | 46 | 7.881  | 21.528 | 5.804  |
|    | H  | 47 | 5.310  | 21.682 | 4.322  |
|    | H  | 48 | 6.072  | 17.414 | 4.411  |
|    | H  | 49 | 8.224  | 16.916 | 5.321  |
|    | H  | 50 | 8.125  | 16.176 | 3.684  |
|    | H  | 51 | 17.994 | 18.689 | -1.185 |
|    | H  | 52 | 7.182  | 15.013 | -0.734 |
|    | H  | 53 | 5.330  | 19.717 | 0.256  |
|    | H  | 54 | 17.540 | 20.254 | -1.924 |
|    | H  | 55 | 13.144 | 18.167 | 6.327  |
|    | H  | 56 | 7.345  | 18.130 | -0.021 |
|    | H  | 57 | 13.161 | 19.583 | 5.259  |
|    | H  | 58 | 6.140  | 15.444 | -2.937 |
|    | H  | 59 | 14.269 | 19.520 | 6.656  |

|   |    |        |        |        |
|---|----|--------|--------|--------|
| H | 60 | 7.681  | 14.879 | -3.053 |
| H | 61 | 15.481 | 17.574 | 5.580  |
| H | 62 | 15.503 | 18.989 | 4.505  |
| H | 63 | 18.146 | 20.187 | -0.242 |
| H | 64 | 15.636 | 20.469 | -0.296 |
| H | 65 | 15.472 | 18.984 | -1.227 |
| H | 66 | 12.113 | 22.900 | -0.873 |
| H | 67 | 12.753 | 22.915 | -2.528 |
| H | 68 | 15.059 | 22.342 | -1.625 |
| H | 69 | 7.889  | 20.256 | 3.207  |
| N | 70 | 9.691  | 11.238 | 4.367  |
| N | 71 | 11.155 | 12.754 | 3.660  |
| N | 72 | 6.702  | 18.118 | 2.538  |
| N | 73 | 7.445  | 20.365 | 4.119  |
| N | 74 | 7.123  | 15.692 | -2.787 |
| N | 75 | 6.361  | 17.939 | -0.229 |
| O | 76 | 6.507  | 19.319 | 5.922  |
| O | 77 | 5.834  | 23.263 | 5.509  |
| O | 78 | 11.637 | 15.524 | 4.612  |
| O | 79 | 4.937  | 16.386 | -1.133 |
| O | 80 | 4.606  | 19.025 | 2.788  |
| S | 81 | 9.010  | 16.501 | 0.793  |
| S | 82 | 9.787  | 17.975 | 3.809  |
| S | 83 | 10.240 | 22.284 | 4.279  |
| S | 84 | 12.560 | 20.656 | -1.735 |
| S | 85 | 16.037 | 18.518 | 1.090  |
| S | 86 | 14.103 | 17.219 | 3.633  |
| S | 87 | 12.400 | 17.828 | 0.360  |
| S | 88 | 13.204 | 20.849 | 2.109  |
| S | 89 | 9.801  | 20.388 | 0.851  |

## References

- 1 B. Delley, *J. Chem. Phys.*, 1990, **92**, 508-517.
- 2 B. Delley, in *Modern density functional theory: a tool for chemistry*, eds. J. M. Seminario and P. Politzer, Elsevier, Amsterdam, 1995, p. 221-254
- 3 B. Delley, *J. Chem. Phys.*, 2000, **113**, 7756-7764.
- 4 I. G. Dance, in *Transition Metal Sulfur Chemistry: Biological and Industrial Significance*, eds. E. I. Stiefel and K. Matsumoto, American Chemical Society, Washington, DC, USA, 1996, p. 135-152
- 5 I. Dance, *J. Chem. Soc., Chem. Commun.*, 1998, 523-530.
- 6 I. Dance, *J. Am. Chem. Soc.*, 2005, **127**, 10925-10942.
- 7 I. Dance, *Dalton Trans.*, 2011, **40**, 6480-6489.
- 8 I. Dance, *Molecular Simulation*, 2008, **34**, 923-929.
- 9 I. Dance, *Molecular Simulation*, 2011, **37**, 257.
- 10 A. Volbeda, P. Amara, C. Darnault, J.-M. Mouesca, A. Parkin, M. M. Roessler, F. A. Armstrong and J. C. Fontecilla-Camps, *Proceedings of the National Academy of Sciences*, 2012, **109**, 5305-5310.

- <sup>11</sup> S. Frielingsdorf, J. Fritsch, A. Schmidt, M. Hammer, J. Löwenstein, E. Siebert, V. Pelmeshnikov, T. Jaenicke, J. Kalms, Y. Rippers, F. Lenzian, I. Zebger, C. Teutloff, M. Kaupp, R. Bittl, P. Hildebrandt, B. Friedrich, O. Lenz and P. Scheerer, *Nat Chem Biol*, 2014, **10**, 378-385.
- <sup>12</sup> M.-E. Pandelia, D. Bykov, R. Izsak, P. Infossi, M.-T. Giudici-Ortoni, E. Bill, F. Neese and W. Lubitz, *Proceedings of the National Academy of Sciences*, 2013, **110**, 483-488.
- <sup>13</sup> J.-M. Mouesca, J. C. Fontecilla-Camps and P. Amara, *Angewandte Chemie International Edition*, 2013, **52**, 2002-2006.
- <sup>14</sup> M. Stein and S. Kaur-Ghumaan, *Biochemical Society Transactions*, 2013, **41**, 1317-1324.
- <sup>15</sup> V. Pelmeshnikov and M. Kaupp, *Journal of the American Chemical Society*, 2013, **135**, 11809-11823.
